1

2

3

4 **Stage-Dependent Differential Gene Expression Profiles of Cranial**

5 **Neural Crest Cells Derived from Mouse Induced Pluripotent Stem**

6 **Cells**

7

8

9 Ayano Odashima<sup>1</sup> ¶, Shoko Onodera<sup>2</sup>, Akiko Saito<sup>2</sup>, Takashi Nakamura<sup>2</sup>, Yuuki Ogihara<sup>3</sup>,

10 Tatsuya Ichinohe<sup>3</sup>, Toshifumi Azuma<sup>1,2\*</sup>

11

12

13 <sup>1</sup> Department of Oral Health Science Center, Tokyo Dental College, Tokyo, Japan

14

15 <sup>2</sup> Department of Biochemistry, Tokyo Dental College, Tokyo, Japan

16

17 <sup>3</sup> Department of Dental Anesthesiology, Tokyo Dental College, Tokyo, Japan

18

19 ¶ These authors contributed equally to this work.

20 \*Corresponding author

21 E-mail [satouayano@tdc.ac.jp](mailto:satouayano@tdc.ac.jp)

22

## 23 **Abstract**

24 Cranial neural crest cells (cNCCs) comprise a multipotent population of cells that migrate into  
25 the pharyngeal arches of the vertebrate embryo and differentiate into a broad range of derivatives  
26 of the craniofacial organs. Consequently, migrating cNCCs are considered as one of the most  
27 attractive candidate sources of cells for regenerative medicine. In this study, we analyzed the gene  
28 expression profiles of cNCCs at different time points after induction by conducting three  
29 independent RNA sequencing experiments. We successfully induced cNCC formation from  
30 mouse induced pluripotent stem (miPS) cells by culturing them in neural crest inducing media for  
31 14 days. We found that these cNCCs expressed several neural crest specifier genes but were  
32 lacking some previously reported specifiers, such as paired box 3 (*Pax3*), msh homeobox 1  
33 (*Msx1*), and Forkhead box D3 (*FoxD3*), which are presumed to be essential for neural crest  
34 development in the embryo. Thus, a distinct molecular network may the control gene expression  
35 in miPS-derived cNCCs. We also found that *c-Myc*, ETS proto-oncogene 1, transcription factor  
36 (*Ets1*), and sex determining region Y-box 10 (*Sox10*) were only detected at 14 days after induction.  
37 Therefore, we assume that these genes would be useful markers for migratory cNCCs induced  
38 from miPS cells. Eventually, these cNCCs comprised a broad spectrum of protocadherin (*Pcdh*)  
39 and a disintegrin and metalloproteinase with thrombospondin motifs (*Adamts*) family proteins,  
40 which may be crucial in their migration.

## 41 **Introduction**

42 Stem cell-based tissue engineering is important in the field of oral science as it allows the  
43 regeneration of damaged tissues or organs [1,2]. Various stem cell populations have been  
44 identified as having a regeneration potential in the craniofacial region; however, the cranial neural  
45 crest cells (cNCCs) are considered as one of the most important candidates due to their role in  
46 craniofacial tissue organization [3].

47 cNCCs comprise a multipotent population of migratory cells that are unique to the vertebrate  
48 embryo and give rise to a broad range of derivatives [4,5], with the neural crest (NC) being  
49 capable of forming teratoma when transplanted into the immunocompromised animals [6]. The  
50 development of cNCCs involves three stages [7–10]: the neural plate border stage, the  
51 premigratory stage, and the migratory stage. During the migratory stage, the cNCCs delaminate  
52 from the posterior midbrain and individual rhombomeres in the hindbrain [11] and migrate into  
53 the pharyngeal arches to form skeletal elements of the face and teeth and contribute to the  
54 pharyngeal glands (thymus, thyroid, and parathyroid) [12]. Consequently, presumably cNCCs  
55 may represent a new treatment strategy for diseases in the craniofacial region [13].

56 Development from the premigratory to migratory stage proceeds swiftly [14], making it  
57 difficult to isolate and characterize a pure cNCC population from the embryo [15]. A recent  
58 transcriptome analysis of pure populations of sex determining region Y-box 10 (*Sox10*) +

59 migratory cNCCs from chicks [16] has greatly improved our understanding of the characteristics  
60 of cNCCs, and methods for deriving NCCs from the embryonic stem (ES) cells have also been  
61 reported [17–30]; however, it remains unclear whether these cells are in the migratory stage and  
62 how long it takes to promote ES cell-derived NCCs from the pre-migratory to migratory stage.

63 In recent years, the use of induced pluripotent stem (iPS) cells as a revolutionary approach  
64 to the treatment of various medical conditions has gained immense attention [31,32] and iPS cells  
65 have several clear advantages over ES cells and primary cultured cNCCs as a cell source in  
66 regenerative medicine [16]. NCCs have been generated from iPS cells in numerous ways [24,33–  
67 38], with two reports having examined the differentiation of NCCs from ES or iPS cells [24,39]  
68 and two articles having described the protocol for differentiating NCCs from mouse iPS (miPS)  
69 cells [33,34]; however, few studies have investigated the changes in the properties of these NCCs  
70 overtime during the dynamic differentiation processes in the NC, in particular, during the  
71 migratory stage. Embryonic NC development depends on several environmental factors that  
72 influence the NC progenitors, regulation, and the timing of differentiation, making the elucidation  
73 of the gene regulatory network and expression profiles of miPS cell-derived cNCCs important.

74 Recent advances in the next-generation RNA sequencing technology (RNA-seq) have made  
75 it possible to analyze the gene expression profiles comprehensively [40–42]. Therefore, here, we  
76 used RNA-seq to investigate the gene expression landscape of cNCCs induced from miPS cells.

77           We treated the iPS-derived cells with cNCC induction medium for 14 days and performed  
78   triplicate RNA-seq experiments. We found that standard NC markers such as nerve growth factor  
79   receptor (*Ngfr*), snail family transcriptional repressor 1 (*Snai1*), and *Snai2* were remarkably  
80   increased at 7 days after cNCC induction; whereas, the expression of the cNCC markers ETS  
81   proto-oncogene 1, transcription factor (*Ets1*), and *Sox5*, *-8*, *-9*, and *-10* characteristically increased  
82   at 14 days after cNCC induction. Nestin (*Nes*) was upregulated throughout cNCC differentiation,  
83   as described previously [23]. In contrast, the homeobox genes such as msh homeobox 1 (*Msx1*),  
84   paired box 3 (*Pax3*), and *Pax7* were not detected in the NC after a longer period of differentiation,  
85   despite their expressions having been observed in several animals [43–52]. Furthermore, the  
86   expression of Forkhead box D3 (*FoxD3*), which is known to be required for maintaining  
87   pluripotency in mouse ES cells [53] and is also an important NC specifier transcription factor  
88   during embryonic development, decreased over time, suggesting that it is not a cNCC specifier in  
89   iPS-derived cells.

90           Another important finding was the remarkable upregulation of several metzincins, including  
91   members of the disintegrin and metalloproteinase domain metallopeptidase with thrombospondin  
92   motifs (Adamts) metalloproteinase family, which play crucial roles in modulating the  
93   extracellular matrix (ECM) during development [54–56]. We assume that various kinds of  
94   Adamts proteins produce distinct extracellular proteins that are digested by cNCC swallowing

95 them to easily migrate toward their final destinations. We also found that the expressions of nearly  
96 all procadherin (Pcdh) superfamily members were increased, some only at the migratory stage.  
97 Pcdh is the largest subfamily of cadherins and the digestion of Pcdh protein by Adam proteins is  
98 crucial for development [57].

99 Eventually, our results indicated that *c-Myc*; *Ets1*; *Sox10*; *Adamts2* and -8; protocadherin  
100 alpha 2 (*Pcdha2*); *Pcdha5*, -7, -11, and -12; protocadherin alpha subfamily C,1 (*Pcdhac1*); and  
101 protocadherin gamma subfamily C, 3 (*Pcdhgc3*) may represent appropriate markers for migratory  
102 cNCCs induced from miPS cells.

103

## 104 **Materials and Methods**

### 105 **miPS cell culture**

106 All of the mouse studies were conducted in accordance with protocols approved by the  
107 Animal Research Committee of Tokyo Dental College (No. 270401).

108 The miPS cells that were used in this study (APS0001; iPS-MEF-Ng-20D-17 mouse induced  
109 pluripotent stem cell line) were purchased from RIKEN BRC (Ibaraki, Japan) [58]. The cells were  
110 maintained on inactivated murine embryonic fibroblast (MEF) feeder cells in Dulbecco's  
111 Modified Eagle's Medium (DMEM; Invitrogen, Carlsbad, CA, USA) supplemented with 15%  
112 KnockOut™ Serum Replacement (Invitrogen), 1% nonessential amino acids (Chemicon,

113 Temecula, CA, USA), 1% L-glutamine (Chemicon), 1000 U/ml penicillin–streptomycin (P/S;  
114 Invitrogen), and 0.11 mM 2-mercaptoethanol (Wako Pure Chemical Industries Ltd., Osaka,  
115 Japan) and were passaged in 60-mm cell culture plates at a density of  $1 \times 10^5$  cells/plate. The cells  
116 were grown in 5% CO<sub>2</sub> at 95% humidity and the culture medium was changed each day.

117

## 118 **Embryoid body (EB) formation and cNCC differentiation**

119 We obtained cultured cNCC cells following a previously described procedure [59], as  
120 outlined in Fig 1. miPS cells were dissociated with 0.05% trypsin–ethylenediaminetetraacetic acid  
121 (EDTA; Invitrogen) and were transferred to low-attachment, 10-mm petri dishes at a density of 2  
122  $\times 10^6$  cells/plate to generate EBs. The EBs were then cultured in the NC induction medium  
123 comprising a 1:1 mixture of DMEM and F12 nutrient mixture (Invitrogen) and Neurobasal™  
124 medium (Invitrogen) supplemented with  $0.5 \times$  N2 (Invitrogen),  $0.5 \times$  B27 (Invitrogen), 20 ng/ml  
125 basic fibroblast growth factor (Reprocell, Yokohama, Japan), 20 ng/ml epidermal growth factor  
126 (Peprotech, Offenbach, Germany), and 1% penicillin–streptomycin (P/S) for 4 days, during which  
127 time the medium was changed every other day. After 4 days, the day 0 (d0) EBs were collected  
128 and plated on 60-mm cell culture plates coated with 1 $\mu$ g/ml collagen type I (Advanced BioMatrix,  
129 San Diego, CA, USA). The cells were then subcultured in the same medium, which was changed  
130 every other day, and any rosetta-forming cells were eliminated. After 7–10 days, d7 cells were

131 dissociated with 0.05% trypsin–EDTA and transferred to 60-mm cell culture plates coated with  
132 1µg/ml collagen type I at a density of  $1 \times 10^5$  cells/plate to generate 14 cells. The cells from each  
133 of these passages were collected for RNA extraction.

134

135 **Fig 1. The experimental protocol that was used to induce the formation of cranial neural**  
136 **crest cells (cNCCs) from mouse induced pluripotent stem (miPS) cells.** The photographs  
137 reveal miPS cells at four different stages: initial miPS cells, embryoid body (EB) on day 0 (d0),  
138 and cNCCs on d7 and d14. Small circles represent miPS cells; large circles represent EBs; ellipses  
139 represent d7 and d14 cells. Scale bar = 50 µm.

140

## 141 **O9-1 cell culture**

142 O9-1 cells, which are mouse cNCC line, were purchased from Millipore (Billerica, MA,  
143 USA) and cultured as previously described [50] as a control.

144

## 145 **RNA isolation and quantitative reverse transcription** 146 **polymerase chain reaction analysis**

147 The representative NC markers *Ngfr*, *Snai1*, *Snai2*, *Sox9*, and *Sox10* were selected and  
148 analyzed by quantitative reverse transcription polymerase chain reaction (qRT-PCR) analysis.



149 Total RNA was extracted using QIAzol<sup>®</sup> reagent (Qiagen, Valencia, CA, USA) according to the  
150 manufacturer's protocol and RNA purity was assessed using a NanoDrop<sup>®</sup> ND-1000  
151 spectrophotometer (Thermo Fisher Scientific, Waltham, MA, USA), which revealed that each  
152 RNA sample had an A260/A280 ratio of >1.9. Complementary DNA (cDNA) was synthesized  
153 using a high-capacity cDNA reverse transcription kit (Applied Biosystems, Foster City, CA,  
154 USA) and qRT-PCR analysis was performed using Premix Ex Taq<sup>™</sup> reagent (Takara Bio Inc.,  
155 Otsu, Japan) according to the manufacturer's protocol and the Applied Biosystems<sup>®</sup> 7500 Fast  
156 Real-Time PCR System, with the primer sequences presented in Table 1. All samples were  
157 normalized to levels of 18S ribosomal RNA (*18S rRNA*). The relative expressions of the genes of  
158 interest were analyzed using the  $\Delta\Delta C_t$  method and were compared among the groups using  
159 analysis of variance (ANOVA) followed by the Bonferroni test where the significant differences  
160 were detected among the groups. A significance level of  $p < 0.05$  was used for all analyses and  
161 all data are expressed as means  $\pm$  standard deviations (SD).

162

163 **Table 1. Primers used for quantitative reverse transcription polymerase chain reaction**

164 **(qRT-PCR).**

| Gene                 | Forward primer sequence | Reverse primer sequence |
|----------------------|-------------------------|-------------------------|
| <i>18S rRNA</i>      | CGGACAGGATTGACAGATTG    | CGCTCCACCAACTAAGAACG    |
| <i>Ngfr(p75NTR)</i>  | ACTGAGCGCCAGTTACGC      | CGTAGACCTTGTGATCCATCG   |
| <i>Snai1 (Snail)</i> | CTTGTGTCTGCACGACCTGT    | AGGAGAATGGCTTCTCACCA    |
| <i>Snai2 (Slug)</i>  | CATTGCCTTGTGTCTGCAAG    | CAGTGAGGGCAAGAGAAAGG    |

|              |                      |                      |
|--------------|----------------------|----------------------|
| <i>Sox9</i>  | GTACCCGCATCTGCACAAC  | CTCCTCCACGAAGGGTCTCT |
| <i>Sox10</i> | ATGTCAGATGGGAACCCAGA | GTCTTTGGGGTGGTTGGAG  |

165

## 166 **Immunohistochemistry**

167 The cells were fixed with 4% paraformaldehyde (Wako Pure Chemical Industries Ltd.) for  
168 15 min followed by methanol (Wako Pure Chemical Industries Ltd) for 5 min. After washing, the  
169 nonspecific binding of antibodies was blocked by adding 5% bovine serum albumin (BSA; Wako  
170 Pure Chemical Industries Ltd.) in a phosphate buffered saline (PBS) with 0.5% Triton X-100  
171 (PBST) for 1 h. The cells were then incubated with the primary antibodies Snai1 1:50 for goat  
172 anti-rabbit (Proteintech Group, Inc. Chicago, IL, USA) and Sox10 1:500 for goat anti-mouse (Atlas  
173 Antibodies, Bromma, Sweden) in PBST for 2 nights at 4 °C. They were then incubated in the  
174 secondary antibodies fluorescein isothiocyanate conjugated anti-rabbit IgG (Abcam, Cambridge,  
175 MA, USA) at a dilution of 1:500 for Snai1 and anti-mouse IgG (Invitrogen) at a dilution of 1:500  
176 for Sox10 in PBST for 1 h. Eventually, the cells were stained with 4,6-diamidino-2-phenylindole  
177 (DAPI; Sigma, Livonia, MI, USA) to visualize the nuclear DNA.

178

## 179 **RNA-seq and analysis**

180 Total RNA from each sample was used to construct libraries with the Illumina TruSeq  
181 Stranded mRNA LT Sample Prep Kit (Illumina, San Diego, CA, USA), according to the

182 manufacturer's instructions. Polyadenylated mRNAs are commonly extracted using oligo-dT  
183 beads, following which the RNA is often fragmented to generate reads that cover the entire length  
184 of the transcripts. The standard Illumina approach relies on randomly primed double-stranded  
185 cDNA synthesis followed by end-repair, ligation of dsDNA adapters, and PCR amplification. The  
186 multiplexed libraries were sequenced as 125-bp paired-end reads using the Illumina HiSeq2500  
187 system (Illumina). Prior to performing any analysis, we confirmed the quality of the data and  
188 undertook read cleaning, such as adapter removal and simple quality filtering, using Trimmomatic  
189 (ver. 0.32). The paired-end reads were then mapped to the mouse genome reference sequence  
190 GRCm38 using the Burrows–Wheeler Aligner (ver. 0.7.10). The number of sequence reads that  
191 were mapped to each gene domain using SAM tools (ver. 0.1.19) was counted and the reads per  
192 kilobase of transcript per 1 million mapped reads (RPKM) for known transcripts were calculated  
193 to normalize the expression level data to gene length and library size, allowing different samples  
194 to be compared.

195

## 196 **Results**

### 197 **Gene expression profiles and immunohistochemistry of cNCCs** 198 **differentiated from miPS cells**

199 The expressions of the NC markers *Ngfr*, *Snai1*, *Snai2*, *Sox9*, and *Sox10* were examined by

200 qRT-PCR in cNCCs differentiated from miPS cells as well as in O9-1 cells as a control. We  
201 detected the expression of all genes except *Ngfr* and *Sox10* in the O9-1 cells [50]. In contrast, all  
202 five genes were detected in the cNCCs, with the premigratory neural crest markers *Ngfr*, *Snai1*,  
203 and *Snai2* having the highest expression levels in d7 cells and the migratory and cranial neural  
204 crest markers *Sox9* and *Sox10* having the highest levels in d14 cells (Fig. 2A).

205 The strongest immunofluorescent staining was detected in d7 cells for *Snai1* and d14 cells  
206 for *Sox10* (Fig 2B).

207

208 **Fig 2. Comparison between O9-1 cells and cranial neural crest cells (cNCCs) derived from**  
209 **mouse induced pluripotent stem (miPS) cells using quantitative reverse transcription**  
210 **polymerase chain reaction (qRT-PCR) and immunostaining.** (A) Expression of the  
211 premigratory neural crest (NC) markers *Ngfr*, *Snai1*, and *Snai2* and the migratory NC and cNC  
212 markers *Sox9* and *Sox10*. Expressions of the premigratory NC markers increased in day 7 (d7)  
213 cells, whereas those of the migratory markers increased in d14 cells. *Sox10* was not detected in  
214 the O9-1 cells. Each experiment was performed in triplicate with values representing the mean  $\pm$   
215 SD. Groups were compared using ANOVA followed by the Bonferroni test:  $*p < 0.05$ . (B)  
216 Immunostaining of d7 and d14 cells. *Sox10* was more highly expressed in d14 cells, whereas  
217 *Snai1*

## 218 NC specifier transcription factors

219 We conducted a literature search of NC specifier transcription factors that have been  
 220 identified *in vivo* [16, 43–52, 60–106] (Tables 2 and 3) and compared these with our RNA-seq  
 221 results. The relative expressions of genes that underwent a significant change in expression are  
 222 presented in Fig 3A.

223

224 **Table 2. Cranial neural crest cells (cNCCs) genes that have previously been examined in**

225 **vivo.**

|              | Reference |                             | Vertebrates |          |          |          |          | RNA-seq |     |
|--------------|-----------|-----------------------------|-------------|----------|----------|----------|----------|---------|-----|
|              |           |                             | <i>L</i>    | <i>Z</i> | <i>X</i> | <i>C</i> | <i>M</i> | d7      | d14 |
| <i>Sox10</i> | 60        | Antonellis A et al., 2006   |             |          |          | ○        |          | ×       | ○   |
|              | 61        | Betancur P et al., 2010     |             |          |          | ○        |          |         |     |
|              | 62        | Rinon A et al., 2011        |             |          |          | ○        |          |         |     |
|              | 63        | Hari L et al., 2012         |             |          |          |          | ○        |         |     |
|              | 16        | Simões-Costa M et al., 2014 |             |          |          | ○        |          |         |     |
|              | 64        | Murko C et al., 2016        |             |          |          |          | ○        |         |     |
| <i>Sox9</i>  | 65        | Spokony RF et al., 2002     |             | ○        |          |          |          | ○       | ○   |
|              | 63        | Hari L et al., 2012         |             |          |          |          | ○        |         |     |
| <i>Sox8</i>  | 16        | Simões-Costa M et al., 2014 |             |          |          | ○        |          | ○       | ○   |
| <i>Sox5</i>  | 66        | Perez-Alcala S et al., 2004 |             |          |          | ○        |          | ○       | ○   |
| <i>Snai2</i> | 63        | Hari L et al., 2012         |             |          |          |          | ○        | ○       | ×   |
|              | 16        | Simões-Costa M et al., 2014 |             |          |          | ○        |          |         |     |
| <i>Ets1</i>  | 61        | Betancur P et al., 2010     |             |          |          | ○        |          | ×       | ○   |
|              | 67        | Meyer B et al., 2013        |             |          |          | ○        |          |         |     |
| <i>Zic1</i>  | 68        | Nagai T et al., 1997        |             |          |          |          | ○        | ○       | ×   |
| <i>Zic2</i>  | 68        | Nagai T et al., 1997        |             |          |          |          | ○        | ×       | ×   |
|              | 69        | Teslla JJ et al., 2013      |             | ○        |          |          |          |         |     |

|               |    |                             |  |   |  |   |   |   |   |
|---------------|----|-----------------------------|--|---|--|---|---|---|---|
| <i>Zic3</i>   | 67 | Nagai T et al., 1997        |  |   |  |   | ○ | × | × |
| <i>Lmo4</i>   | 16 | Simões-Costa M et al., 2014 |  |   |  | ○ |   | × | × |
| <i>Rxrg</i>   | 16 | Simões-Costa M et al., 2014 |  |   |  | ○ |   | × | ○ |
| <i>Ltk</i>    | 16 | Simões-Costa M et al., 2014 |  |   |  | ○ |   | × | × |
| <i>Col9a3</i> | 16 | Simões-Costa M et al., 2014 |  |   |  | ○ |   | × | ○ |
| <i>Id2</i>    | 70 | Das A et al., 2012          |  | ○ |  |   |   |   | ○ |
|               | 16 | Simões-Costa M et al., 2014 |  |   |  | ○ |   |   | ○ |
| <i>Ebfl</i>   | 16 | Simões-Costa M et al., 2014 |  |   |  | ○ |   | ○ | × |
| <i>Alex1</i>  | 16 | Simões-Costa M et al., 2014 |  |   |  | ○ |   | × | × |
| <i>Lhx9</i>   | 16 | Simões-Costa M et al., 2014 |  |   |  | ○ |   | × | × |
| <i>Twist1</i> | 70 | Das A et al., 2012          |  | ○ |  |   |   | ○ | ○ |
| <i>Meis2</i>  | 71 | Machon O et al., 2015       |  |   |  |   | ○ | ○ | ○ |

226

|          |                  |
|----------|------------------|
| <i>L</i> | <i>Lamprey</i>   |
| <i>Z</i> | <i>Zebrafish</i> |
| <i>X</i> | <i>Xenopus</i>   |
| <i>C</i> | <i>Chick</i>     |
| <i>M</i> | <i>Mouse</i>     |

227 Open circles indicate genes that were upregulated on day 7 (d7) or d14 compared with d0 [log fold  
 228 change (FC) > 1,  $p < 0.01$ , false discovery rate (FDR) < 0.05], whereas crosses indicate genes that  
 229 were not upregulated.

230

231 **Table 3. Neural crest (NC) transcription factors that have previously been examined *in vivo*.**

|            | Reference | Vertebrates                   |          |          |          |          | Stage |   |   | RNA-seq |     |
|------------|-----------|-------------------------------|----------|----------|----------|----------|-------|---|---|---------|-----|
|            |           | <i>L</i>                      | <i>Z</i> | <i>X</i> | <i>C</i> | <i>M</i> | N     | P | M | d7      | d14 |
| <i>Ap2</i> | 72        | Mitchell PJ et al., 1991      |          |          |          |          | ○     | ○ |   | ○       | ×   |
|            | 73        | Shen H et al., 1997           |          |          |          | ○        | ○     |   |   |         |     |
|            | 74        | Luo T et al., 2003            |          |          | ○        |          | ○     |   |   |         |     |
|            | 43        | Sauka-Spengler T et al., 2007 | ○        |          |          |          |       | ○ |   |         |     |
|            | 44        | Nikitina N et al., 2008       | ○        |          |          |          | ○     |   |   |         |     |
|            | 45        | Khudyakov J et al., 2010      |          |          | ○        |          | ○     | ○ | ○ |         |     |

|              |    |                               |   |  |  |   |  |  |   |   |   |   |  |  |  |  |   |   |
|--------------|----|-------------------------------|---|--|--|---|--|--|---|---|---|---|--|--|--|--|---|---|
|              | 75 | de Crozé N et al., 2011       |   |  |  | ○ |  |  |   |   |   |   |  |  |  |  |   |   |
|              | 76 | Wang WD et al., 2011          |   |  |  | ○ |  |  |   |   |   |   |  |  |  |  |   |   |
|              | 77 | Powell DR et al., 2013        |   |  |  | ○ |  |  |   |   |   |   |  |  |  |  |   |   |
| <i>Dlx5</i>  | 78 | Yang L et al., 1998           |   |  |  |   |  |  | ○ | ○ |   |   |  |  |  |  |   |   |
|              | 79 | Luo T et al., 2001            |   |  |  | ○ |  |  |   | ○ |   |   |  |  |  |  |   |   |
|              | 43 | Sauka-Spengler T et al., 2007 | ○ |  |  |   |  |  |   | ○ |   |   |  |  |  |  | ○ | ○ |
|              | 45 | Khudyakov J et al., 2010      |   |  |  |   |  |  | ○ | ○ |   |   |  |  |  |  |   |   |
| <i>Dlx3</i>  | 43 | Sauka-Spengler T et al., 2007 | ○ |  |  |   |  |  |   | ○ |   |   |  |  |  |  | × | × |
|              | 45 | Khudyakov J et al., 2010      |   |  |  |   |  |  | ○ | ○ |   |   |  |  |  |  |   |   |
| <i>Gbx2</i>  | 80 | Li B et al., 2009             |   |  |  |   |  |  | ○ | ○ |   |   |  |  |  |  | × | × |
| <i>N-myc</i> | 44 | Nikitina N et al., 2008       | ○ |  |  |   |  |  |   | ○ |   |   |  |  |  |  | × | × |
|              | 45 | Khudyakov J et al., 2010      |   |  |  |   |  |  | ○ | ○ |   |   |  |  |  |  |   |   |
| <i>Msx1</i>  | 46 | Hill RE et al., 1989          |   |  |  |   |  |  |   | ○ | ○ |   |  |  |  |  |   |   |
|              | 47 | Suzuki A et al., 1997         |   |  |  |   |  |  | ○ |   | ○ |   |  |  |  |  |   |   |
|              | 43 | Sauka-Spengler T et al., 2007 | ○ |  |  |   |  |  |   | ○ |   |   |  |  |  |  | × | × |
|              | 44 | Nikitina N et al., 2008       | ○ |  |  |   |  |  |   | ○ |   |   |  |  |  |  |   |   |
|              | 45 | Khudyakov J et al., 2010      |   |  |  |   |  |  | ○ | ○ | ○ | ○ |  |  |  |  |   |   |
|              | 48 | Simões-Costa M et al., 2012   |   |  |  |   |  |  | ○ | ○ |   |   |  |  |  |  |   |   |
| <i>Pax3</i>  | 49 | Goulding MD et al., 1991      |   |  |  |   |  |  |   | ○ | ○ | ○ |  |  |  |  |   |   |
|              | 50 | Bang AG et al., 1999          |   |  |  |   |  |  | ○ |   | ○ |   |  |  |  |  |   |   |
|              | 43 | Sauka-Spengler T et al., 2007 | ○ |  |  |   |  |  |   | ○ |   |   |  |  |  |  | ○ | × |
|              | 44 | Nikitina N et al., 2008       | ○ |  |  |   |  |  |   | ○ | ○ |   |  |  |  |  |   |   |
|              | 48 | Simões-Costa M et al., 2012   |   |  |  |   |  |  | ○ | ○ |   |   |  |  |  |  |   |   |
|              | 51 | Alkobtawi M et al., 2018      |   |  |  |   |  |  | ○ |   | ○ | ○ |  |  |  |  |   |   |
| <i>Pax7</i>  | 43 | Sauka-Spengler T et al., 2007 | ○ |  |  |   |  |  |   | ○ |   |   |  |  |  |  |   |   |
|              | 44 | Nikitina N et al., 2008       | ○ |  |  |   |  |  |   | ○ |   |   |  |  |  |  |   |   |
|              | 45 | Khudyakov J et al., 2010      |   |  |  |   |  |  | ○ | ○ | ○ | ○ |  |  |  |  | ○ | × |
|              | 52 | Maczkowiak F et al., 2010     |   |  |  |   |  |  | ○ |   | ○ | ○ |  |  |  |  |   |   |
|              | 48 | Simões-Costa M et al., 2012   |   |  |  |   |  |  | ○ | ○ |   |   |  |  |  |  |   |   |
| <i>Zic1</i>  | 68 | Nagai T et al., 1997          |   |  |  |   |  |  |   | ○ | ○ | ○ |  |  |  |  |   |   |
|              | 81 | Nakata K et al., 1998         |   |  |  |   |  |  | ○ |   | ○ |   |  |  |  |  |   |   |
|              | 43 | Sauka-Spengler T et al., 2007 | ○ |  |  |   |  |  |   | ○ |   |   |  |  |  |  | ○ | × |
|              | 44 | Nikitina N et al., 2008       | ○ |  |  |   |  |  |   | ○ |   |   |  |  |  |  |   |   |
|              | 45 | Khudyakov J et al., 2010      |   |  |  |   |  |  | ○ | ○ |   |   |  |  |  |  |   |   |

|               |    |                               |   |   |   |   |   |   |   |   |   |   |
|---------------|----|-------------------------------|---|---|---|---|---|---|---|---|---|---|
| <i>Zic2</i>   | 68 | Nagai T et al., 1997          |   |   |   |   | ○ | ○ | ○ |   |   |   |
|               | 81 | Nakata K et al., 1998         |   | ○ |   |   |   | ○ |   |   | × | × |
|               | 43 | Sauka-Spengler T et al., 2007 | ○ |   |   |   |   | ○ |   |   |   |   |
| <i>Zic3</i>   | 68 | Nagai T et al., 1997          |   |   |   |   | ○ | ○ | ○ |   |   |   |
|               | 81 | Nakata K et al., 1998         |   | ○ |   |   |   | ○ |   |   | × | × |
|               | 43 | Sauka-Spengler T et al., 2007 | ○ |   |   |   |   | ○ |   |   |   |   |
| <i>FoxD3</i>  | 82 | Dottori M et al., 2001        |   |   |   |   | ○ |   | ○ | ○ |   |   |
|               | 83 | Kos R et al., 2001            |   |   |   | ○ |   |   | ○ |   |   |   |
|               | 43 | Sauka-Spengler T et al., 2007 | ○ |   |   |   |   |   |   | ○ |   |   |
|               | 45 | Khudyakov J et al., 2010      |   |   |   | ○ |   | ○ | ○ | ○ | × | × |
|               | 76 | Wang WD et al., 2011          |   | ○ |   |   |   | ○ |   |   |   |   |
|               | 48 | Simões-Costa M et al., 2012   |   |   |   | ○ |   |   |   | ○ |   |   |
|               | 77 | Powell DR et al., 2013        |   | ○ |   |   |   | ○ |   |   |   |   |
| <i>Meis2</i>  | 71 | Machon O et al., 2015         |   |   |   |   | ○ | ○ | ○ |   | ○ | ○ |
| <i>Ngfr</i>   | 84 | Wilson YM et al., 2004        |   |   |   |   | ○ |   | ○ |   | ○ | × |
| <i>Pdgfra</i> | 85 | Liu L et al., 2002            |   | ○ |   |   |   |   | ○ |   | ○ | ○ |
| <i>Id2</i>    | 86 | Liu KJ et al., 2003           |   |   | ○ |   |   |   |   | ○ |   |   |
|               | 43 | Sauka-Spengler T et al., 2007 | ○ |   |   |   |   |   | ○ |   | ○ | ○ |
|               | 70 | Das A et al., 2012            |   | ○ |   |   |   |   | ○ |   |   |   |
|               | 16 | Simões-Costa M et al., 2014   |   |   |   | ○ |   |   |   | ○ |   |   |
| <i>Id3</i>    | 86 | Liu KJ et al., 2003           |   |   | ○ |   |   |   |   | ○ | ○ | ○ |
|               | 43 | Sauka-Spengler T et al., 2007 | ○ |   |   |   |   |   | ○ |   | ○ | ○ |
| <i>Id4</i>    | 43 | Sauka-Spengler T et al., 2007 | ○ |   |   |   |   |   | ○ |   | ○ | ○ |
| <i>c-Myc</i>  | 43 | Sauka-Spengler T et al., 2007 | ○ |   |   |   |   |   | ○ |   | × | ○ |
|               | 45 | Khudyakov J et al., 2010      |   |   |   | ○ |   | ○ | ○ | ○ |   |   |
| <i>Pfkfb4</i> | 87 | Figueiredo AL et al., 2017    |   |   | ○ |   |   |   | ○ |   | ○ | ○ |
| <i>Elp3</i>   | 88 | Yang X et al., 2016           |   | ○ |   |   |   |   | ○ | ○ | × | × |
| <i>Snai1</i>  | 89 | Sefton M et al., 1998         |   |   |   | ○ | ○ |   | ○ |   |   |   |
|               | 90 | del Barrio MG et al., 2002    |   |   |   | ○ |   |   | ○ | ○ | ○ | × |
|               | 91 | Aybar MJ et al., 2003         |   |   | ○ |   |   |   |   | ○ |   |   |
|               | 43 | Sauka-Spengler T et al., 2007 | ○ |   |   |   |   |   | ○ |   |   |   |
| <i>Snai2</i>  | 92 | Nieto MA et al., 1994         |   |   |   | ○ |   |   | ○ |   |   |   |
|               | 93 | Jiang R et al., 1998          |   |   |   |   | ○ |   |   | ○ | ○ | × |
|               | 90 | del Barrio MG et al., 2002    |   |   |   | ○ |   |   | ○ | ○ |   |   |



|               |                          |                               |   |  |  |  |  |  |   |   |   |  |  |  |  |  |   |   |   |   |   |   |
|---------------|--------------------------|-------------------------------|---|--|--|--|--|--|---|---|---|--|--|--|--|--|---|---|---|---|---|---|
|               | 91                       | Aybar MJ et al., 2003         |   |  |  |  |  |  |   | ○ |   |  |  |  |  |  |   |   |   |   |   |   |
|               | 45                       | Khudyakov J et al., 2010      |   |  |  |  |  |  |   | ○ |   |  |  |  |  |  | ○ | ○ |   |   |   |   |
|               | 94                       | Tien CL et al., 2015          |   |  |  |  |  |  |   | ○ |   |  |  |  |  |  |   | ○ |   |   |   |   |
| <i>Ets1</i>   | 43                       | Sauka-Spengler T et al., 2007 | ○ |  |  |  |  |  |   |   |   |  |  |  |  |  | ○ | × |   | ○ |   |   |
| <i>Sox5</i>   | 95                       | Martin BL et al., 2001        |   |  |  |  |  |  |   | ○ |   |  |  |  |  |  |   |   | ○ |   | ○ |   |
|               | 67                       | Perez-Alcala S et al., 2004   |   |  |  |  |  |  |   | ○ |   |  |  |  |  |  |   |   | ○ | ○ |   |   |
| <i>Sox6</i>   | 67                       | Perez-Alcala S et al., 2004   |   |  |  |  |  |  |   | ○ |   |  |  |  |  |  |   |   | ○ | ○ |   |   |
| <i>Sox8</i>   | 43                       | Sauka-Spengler T et al., 2007 | ○ |  |  |  |  |  |   |   |   |  |  |  |  |  |   |   | ○ |   | ○ |   |
| <i>Sox9</i>   | 96                       | Cheung M et al., 2003         |   |  |  |  |  |  |   | ○ |   |  |  |  |  |  |   |   |   |   |   |   |
|               | 97                       | Cheung M et al., 2005         |   |  |  |  |  |  |   | ○ |   |  |  |  |  |  |   |   | ○ | ○ |   |   |
|               | 43                       | Sauka-Spengler T et al., 2007 | ○ |  |  |  |  |  |   |   |   |  |  |  |  |  |   |   |   | ○ |   |   |
|               | 61                       | Betancur P et al., 2010       |   |  |  |  |  |  |   | ○ |   |  |  |  |  |  |   |   |   |   | ○ |   |
| <i>Sox10</i>  | 98                       | Honoré SM et al., 2003        |   |  |  |  |  |  |   | ○ |   |  |  |  |  |  |   |   |   |   |   |   |
|               | 99                       | McKeown SJ et al., 2005       |   |  |  |  |  |  |   |   | ○ |  |  |  |  |  |   |   |   |   |   |   |
|               | 43                       | Sauka-Spengler T et al., 2007 | ○ |  |  |  |  |  |   |   |   |  |  |  |  |  |   |   |   |   |   |   |
|               | 61                       | Betancur P et al., 2010       |   |  |  |  |  |  |   | ○ |   |  |  |  |  |  |   |   |   |   |   |   |
|               | 100                      | Prasad MK et al., 2011        |   |  |  |  |  |  |   |   |   |  |  |  |  |  |   |   |   |   | ○ |   |
|               | 63                       | Hari L et al., 2012           |   |  |  |  |  |  |   |   | ○ |  |  |  |  |  |   |   |   |   |   | ○ |
|               | 16                       | Simões-Costa M et al., 2014   |   |  |  |  |  |  |   | ○ |   |  |  |  |  |  |   |   |   |   |   |   |
|               | 101                      | Baggiolini A et al., 2015     |   |  |  |  |  |  |   | ○ |   |  |  |  |  |  |   |   |   |   |   |   |
|               | 94                       | Tien CL et al., 2015          |   |  |  |  |  |  |   | ○ |   |  |  |  |  |  |   |   |   |   |   |   |
| 51            | Alkobtawi M et al., 2018 |                               |   |  |  |  |  |  | ○ |   |   |  |  |  |  |  |   |   |   |   |   |   |
| <i>Lmo4</i>   | 16                       | Simões-Costa M et al., 2014   |   |  |  |  |  |  | ○ |   |   |  |  |  |  |  |   |   | ○ | × |   | × |
| <i>Rxrg</i>   | 16                       | Simões-Costa M et al., 2014   |   |  |  |  |  |  | ○ |   |   |  |  |  |  |  |   |   | ○ | × |   | ○ |
| <i>Ltk</i>    | 16                       | Simões-Costa M et al., 2014   |   |  |  |  |  |  | ○ |   |   |  |  |  |  |  |   |   | ○ | × |   | × |
| <i>Col9a3</i> | 16                       | Simões-Costa M et al., 2014   |   |  |  |  |  |  | ○ |   |   |  |  |  |  |  |   |   | ○ | × |   | ○ |
| <i>Alex1</i>  | 16                       | Simões-Costa M et al., 2014   |   |  |  |  |  |  | ○ |   |   |  |  |  |  |  |   |   | ○ | × |   | × |
| <i>Ebfl</i>   | 16                       | Simões-Costa M et al., 2014   |   |  |  |  |  |  | ○ |   |   |  |  |  |  |  |   |   | ○ | ○ |   | × |
| <i>Lhx9</i>   | 16                       | Simões-Costa M et al., 2014   |   |  |  |  |  |  | ○ |   |   |  |  |  |  |  |   |   | ○ | × |   | × |
| <i>ErbB3</i>  | 100                      | Prasad MK et al., 2011        |   |  |  |  |  |  | ○ |   |   |  |  |  |  |  |   |   |   | ○ | × | × |
| <i>Ang2</i>   | 102                      | McKinney MC et al., 2016      |   |  |  |  |  |  | ○ |   |   |  |  |  |  |  |   |   | ○ | × |   | × |
| <i>Ednrb</i>  | 103                      | Lee HO et al., 2003           |   |  |  |  |  |  |   | ○ |   |  |  |  |  |  |   |   | ○ | × |   | ○ |
| <i>Hnk1</i>   | 104                      | Giovannone D et al., 2015     |   |  |  |  |  |  | ○ |   |   |  |  |  |  |  |   |   | ○ | ○ |   | ○ |
| <i>Twist1</i> | 43                       | Sauka-Spengler T et al., 2007 | ○ |  |  |  |  |  |   |   |   |  |  |  |  |  |   |   | ○ | ○ |   | ○ |

|              |     |                      |  |  |  |   |  |  |  |   |   |   |
|--------------|-----|----------------------|--|--|--|---|--|--|--|---|---|---|
| <i>Slit1</i> | 105 | Zuhdi N et al., 2012 |  |  |  | ○ |  |  |  | ○ | ○ | ○ |
| <i>Slit2</i> | 105 | Zuhdi N et al., 2012 |  |  |  | ○ |  |  |  | ○ | ○ | ○ |
| <i>Slit3</i> | 105 | Zuhdi N et al., 2012 |  |  |  | ○ |  |  |  | ○ | ○ | × |

232

| Vertebrates |                  | Stages |                           |
|-------------|------------------|--------|---------------------------|
| <i>L</i>    | <i>Lamprey</i>   | N      | Neural plate border       |
| <i>Z</i>    | <i>Zebrafish</i> | P      | Premigratory neural crest |
| <i>X</i>    | <i>Xenopus</i>   | M      | Migratory neural crest    |
| <i>C</i>    | <i>Chick</i>     |        |                           |
| <i>M</i>    | <i>Mouse</i>     |        |                           |

233

234 Open circles indicate genes that were upregulated on day 7 (d7) or d14 compared with d0 [log fold  
 235 change (FC) > 1,  $p < 0.01$ , false discovery rate (FDR) < 0.05), whereas crosses indicate genes that were  
 236 not upregulated.

237

238 **Fig 3. RNA sequencing results for cranial neural crest cells (cNCCs) differentiated from**

239 **mouse induced pluripotent stem (miPS) cells.** (A) Expression of each of the genes listed in

240 Table 2 at day 0 (d0), d7, and d14 after induction. Sex-determining region Y (SRY)-related high

241 mobility group (HMG) box genes were most upregulated in d14 cells. The vertical axis reveals

242 reads per kilobase of exon per million mapped reads (RPKM) and the horizontal axis indicates

243 time. Each experiment was performed in triplicate with values representing the mean  $\pm$  SD.

244 Groups were compared using ANOVA followed by the Bonferroni test:  $*p < 0.05$ . (B) Expression

245 of genes that have not been examined during the neural crest stages *in vivo*. *Tnc* was most

246 upregulated in the d14 cells, whereas *Cha6* and *Rhob* were upregulated in the d7 cells. The vertical  
247 axis reveals reads per kilobase of exon per million mapped reads (RPKM) and the horizontal axis  
248 indicates time. Open circles indicate genes that were upregulated on day 7 (d7) or d14 compared  
249 with d0 [log fold change (FC) > 1,  $p < 0.01$ , false discovery rate (FDR) < 0.05]. Each experiment  
250 was performed in triplicate with values representing the mean  $\pm$  SD. Groups were compared using  
251 ANOVA followed by the Bonferroni test:  $*p < 0.05$ .

252

253 We found that the transcription factor *AP-2 alpha* (*Ap2*) along with *Pax3* and zinc finger  
254 protein of the cerebellum 1 (*Zic1*), both of which are regulated by *Ap2*, were most highly  
255 expressed in d7 cells (Fig 3A). *Pax6*, which has been reported in human ES and iPS-derived NC  
256 cells (Tables 2 and 3), was detected in both d7 and d14 cells, whereas *Pax7*, which has not  
257 previously been reported in the mouse NC, was also detected in the d7 cells (Fig 3A). In contrast,  
258 the homeobox genes *gastrulation brain homeobox 2* (*Gbx2*), *Msx1*, *distal-less homeobox 3*  
259 (*Dlx3*), *Zic2*, and *Zic3* were not detected in d7 or d14 cells, and the homeobox genes *Zic1* and  
260 *Dlx5* were only expressed in d7 cells, despite these having been reported in the NC of a range of  
261 species (Table 2); however, *Meis homeobox 2* (*Meis2*) was expressed in both d7 and d14 cells.

262 Both MYCN proto-oncogene, bHLH transcription factor (*N-myc*) and *c-Myc* have been  
263 reported in NCCs (Table 3); however, we did not observe *N-myc* expression in d7 or d14 cells

264 and detected *c-Myc* expression in the d7 and d14 group (Fig 3A). Furthermore, we observed  
265 substantial downregulation of the winged-helix transcription factor *FoxD3* over time (Fig 3A),  
266 which is an important factor for maintaining the pluripotency of ES cells and a key NC specifier  
267 that has been implicated in multiple steps of NC development and NCC migration in the embryo  
268 of various species (Table 2).

269 The premigratory NC markers *Ngfr*, heart and neural crest derivatives expressed 2 (*Hand2*),  
270 *Snai1*, and *Snai2* were only detected in the d7 cells; however, other premigratory NC markers,  
271 such as platelet derived growth factor receptor, alpha polypeptide (*Pdgfra*), 6-phosphofructo-2-  
272 kinase/fructose-2,6-biphosphatase 4 (*Pfkfb4*), inhibitor of DNA binding 2 (*Id2*), *Id3*, and *Id4*  
273 were found in both d7 and d14 cells, as was *Nes* (Fig 3A).

274 Migratory neural crest markers expression of *Sox5*, -6, -8, -9, and -10, which encode  
275 members of the sex-determining region Y (SRY)-related high mobility group (HMG)-box family  
276 of transcription factors and have been reported to be crucial in several aspects of NCCs, were  
277 observed in d7 or d14 cells. *Sox10*, which is a known marker of migratory cNCCs in various  
278 species (Table 2), was only detected in d14 cells, as were other migratory NC markers, including  
279 retinoid X receptor gamma (*Rxrg*), collagen type IX alpha 3 chain (*Col9a3*), and endothelin  
280 receptor type B (*Ednrb*; Fig. 3A); however, LIM domain only 4 (*Lmo4*), leukocyte tyrosine kinase  
281 (*Ltk*), erb-b2 receptor tyrosine kinase 3 (*ErbB3*), and angiogenin, ribonuclease A family, member

282 2 (*Ang2*) were not detected in the d14 cells.

283 Twist family bHLH transcription factor 1 (*Twist1*), which is activated by a variety of signal  
284 transduction pathways and is crucial in the downregulation of E-cadherin expression, was  
285 detected in both d7 and d14 cells, as was beta-1,3-glucuronyltransferase 1 (*B3gat1/Hnk1*), or  
286 CD57. In contrast, expression of the trunk NC markers lit guidance ligand 1/2 (*Slit1/2*), which  
287 has been reported to play an important role in the migration of trunk NC cells toward ventral sites,  
288 was upregulated only in the d7 cells (Fig 3A).

289 Eventually, the expressions of tenascin C (*Tnc*), cadherin-6 (*Cdh6*), and ras homolog family  
290 member B (*Rhob*), all of which are related to cell adhesion and motility [106–111], significantly  
291 increased in both d7 and d14 cells (Fig 3B).

292

## 293 **Metzincin superfamily zinc proteinase and protocadherin** 294 **superfamily expressions**

295 Members of the metzincin superfamily are proteinases that have a zinc ion at their active  
296 site. This family includes the matrix metalloproteinases (Mmps), a disintegrin and  
297 metalloproteinase (Adam), and Adamts, all of which have attracted attention as factors involved  
298 in cancer cell invasion and cell migration. *Mmp2*, *-11*, *-14*, *-15*, *-16*, *-24*, and *-28* were  
299 significantly upregulated in the cNNCs (Fig 4A), all of which except *Mmp24* are membrane-

300 bound types. The expressions of *Mmp11* and *-28* were only detected in d7 cells, while all other  
301 *Mmps* were detected in both d7 and d14 cells (Fig 4A, B).

302 Only *Adam1a*, *-8*, *-10*, and *-12* were upregulated in both d7 and d14 cells (Fig 4C, D),  
303 despite the members of this family being important in NC migration and the expressions of  
304 *Adam10*, *-12*, *-15*, *-19*, and *-33* having been observed in the mouse NC [112]. In contrast,  
305 various *Adamts* family genes, which are important for connective tissue organization and cell  
306 migration, were upregulated in either d7 or d14 cells (Fig 4C, D). The expression of *Adamts1* in  
307 particular exhibited a substantial increase in expression, while *Adamts2* and *-8*, which are  
308 presumed to be important in cancer cell invasion [55], increased in the later stages of  
309 differentiation.

310

311 **Fig. 4. RNA sequencing results for the matrix metalloproteinase (*Mmp*), a disintegrin and**  
312 **metalloproteinase (*Adam*), and a disintegrin and metalloproteinase with thrombospondin**  
313 **motifs (*Adamts*) gene families.** (A) Expressions of *Mmp* family genes in mouse. Round marks  
314 alongside d7 or d14 indicate that the genes were upregulated compared with d0 [log fold change  
315 (logFC) > 1,  $p < 0.01$ , false discovery rate (FDR) <0.05], whereas cross marks indicate no  
316 upregulation in d7 or d14 cells. (B) Graphical representation of the upregulation of *Mmp2*, *-11*, *-*  
317 *14*, *-15*, *-16*, *-24*, and *-28* in d7 or d14 cells. *Mmp15* and *-16* were most upregulated in d14 cells.

318 The vertical axis reveals reads per kilobase of exon per million mapped reads (RPKM) and the  
 319 horizontal axis indicates time. Each experiment was performed in triplicate with values  
 320 representing the mean  $\pm$  SD. Groups were compared using ANOVA followed by the Bonferroni  
 321 test:  $*p < 0.05$ . (C) Expressions of *Adam* and *Adamts* genes in mouse. Round marks alongside d7  
 322 or d14 indicate that the genes were upregulated compared with d0 ( $\log_{2}FC > 1$ ,  $p < 0.01$ ,  $FDR <$   
 323  $0.05$ ), whereas cross marks indicate no upregulation. (D) Graphical representation of the  
 324 upregulation of *Adam1a* and 8–12, and *Adamts1–10*, -12, and 15–20 in d7 or d14 cells. *Adam2*,  
 325 -4, -7, and -8, and *Adamts 9* and -12 were most upregulated in d14 cells. The vertical axis reveals  
 326 reads per kilobase of exon per million mapped reads (RPKM) and the horizontal axis indicates  
 327 time. Each experiment was performed in triplicate with values representing the mean  $\pm$  SD.  
 328 Groups were compared using ANOVA followed by the Bonferroni test:  $*p < 0.05$ .

329

330 Most of the *Pcdh* genes, which are involved in cell adhesion, were upregulated in d7 and  
 331 d14 cells (Table 4); however, *Pcdha2*, -5, -7, -11, and -12; *Pcdhac1*; and *Pcdhgc5* were only  
 332 upregulated in the d14 cells.

333

334 **Table 4 Expression of the protocadherin superfamily based on RNA sequencing data.**

| <i>Pcdh</i> | 1 | 7 | 8 | 9 | 10 | 11 | 12 | 15 | 17 | 18 | 19 | 20 |
|-------------|---|---|---|---|----|----|----|----|----|----|----|----|
| d7          | × | ○ | ○ | ○ | ○  | ○  | ×  | ×  | ○  | ○  | ○  | ×  |
| d14         | × | ○ | ○ | ○ | ○  | ○  | ×  | ○  | ○  | ○  | ○  | ×  |

|               |   |   |   |   |   |   |   |   |   |    |    |    |    |    |    |    |    |    |    |    |    |    |   |
|---------------|---|---|---|---|---|---|---|---|---|----|----|----|----|----|----|----|----|----|----|----|----|----|---|
| <i>Pcdha</i>  | 1 | 2 | 3 | 4 | 5 | 6 | 7 | 8 | 9 | 10 | 11 | 12 |    |    |    |    |    |    |    |    |    |    |   |
| d7            | ○ | × | ○ | ○ | × | ○ | × | ○ | ○ | ○  | ×  | ×  |    |    |    |    |    |    |    |    |    |    |   |
| d14           | ○ | ○ | ○ | ○ | ○ | ○ | ○ | ○ | ○ | ○  | ○  | ○  |    |    |    |    |    |    |    |    |    |    |   |
| <i>Pcdhb</i>  | 1 | 2 | 3 | 4 | 5 | 6 | 7 | 8 | 9 | 10 | 11 | 12 | 13 | 14 | 15 | 16 | 17 | 18 | 19 | 20 | 21 | 22 |   |
| d7            | × | ○ | ○ | ○ | ○ | ○ | ○ | ○ | ○ | ○  | ○  | ○  | ○  | ○  | ○  | ○  | ○  | ○  | ○  | ○  | ○  | ○  | ○ |
| d14           | × | ○ | ○ | ○ | ○ | ○ | ○ | ○ | ○ | ○  | ○  | ○  | ○  | ○  | ○  | ○  | ○  | ○  | ○  | ○  | ○  | ○  | ○ |
| <i>Pcdhac</i> | 1 | 2 |   |   |   |   |   |   |   |    |    |    |    |    |    |    |    |    |    |    |    |    |   |
| d7            | × | ○ |   |   |   |   |   |   |   |    |    |    |    |    |    |    |    |    |    |    |    |    |   |
| d14           | ○ | ○ |   |   |   |   |   |   |   |    |    |    |    |    |    |    |    |    |    |    |    |    |   |
| <i>Pcdhgc</i> | 3 | 4 | 5 |   |   |   |   |   |   |    |    |    |    |    |    |    |    |    |    |    |    |    |   |
| d7            | ○ | ○ | × |   |   |   |   |   |   |    |    |    |    |    |    |    |    |    |    |    |    |    |   |
| d14           | ○ | ○ | ○ |   |   |   |   |   |   |    |    |    |    |    |    |    |    |    |    |    |    |    |   |
| <i>Pcdhgb</i> | 1 | 2 | 4 | 5 | 6 | 7 | 8 |   |   |    |    |    |    |    |    |    |    |    |    |    |    |    |   |
| d7            | ○ | ○ | ○ | ○ | ○ | ○ | ○ |   |   |    |    |    |    |    |    |    |    |    |    |    |    |    |   |
| d14           | ○ | ○ | ○ | ○ | ○ | ○ | ○ |   |   |    |    |    |    |    |    |    |    |    |    |    |    |    |   |

335 Open circles indicate genes that were upregulated on day 7 (d7) or d14 compared with d0 [log fold  
 336 change (FC) >1,  $p < 0.01$ , false discovery rate (FDR) < 0.05], whereas crosses indicate genes that were  
 337 not upregulated.

338

## 339 Discussion

340 In this study, we successfully generated miPS-induced cNCCs that were sufficiently close  
 341 to the migratory stage. The NC has previously been generated from ES or iPS cells in various  
 342 ways [24,33–39] and the protocol we used in the present study was based on the methods outlined  
 343 by R. Bajpai et al. [39]; however, few studies have investigated the changes in the properties of  
 344 cNCCs at different time points (Table 5).

345



346 **Table 5 Neural crest (NC) transcription factors that have previously been examined *in vitro*.**

347

| Reference number | Mouse |    | Human |    | Sox10 | Shai2 | Sox9 | Shai1 | Twist | Hnk1 | Id2/Id3 | Mx1 | Ap2 | Pax7 | c-Myc | FoxD3 | Pax3 | Zic1 | Ngf | Pdgfra | Hand2 | Mx2 | Nes | Pax6 | Pax3 |
|------------------|-------|----|-------|----|-------|-------|------|-------|-------|------|---------|-----|-----|------|-------|-------|------|------|-----|--------|-------|-----|-----|------|------|
|                  | iPS   | ES | iPS   | ES |       |       |      |       |       |      |         |     |     |      |       |       |      |      |     |        |       |     |     |      |      |
| d7               | This  | ○  |       |    | ×     | ○     | ○    | ○     | ○     | ○    | ○       | ×   | ○   | ○    | ×     | ×     | ○    | ○    | ○   | ○      | ○     | ×   | ○   | ○    | ○    |
| d14              | study |    |       |    | ○     | ×     | ○    | ×     | ○     | ○    | ○       | ×   | ×   | ×    | ○     | ×     | ×    | ×    | ×   | ○      | ×     | ×   | ○   | ○    | ○    |
| 33               |       | ○  |       |    | ○     |       |      |       |       |      |         |     | ○   |      |       |       | ○    |      |     |        | ○     |     |     |      |      |
| 34               |       | ○  |       |    |       | ○     |      |       |       | ○    |         |     |     |      |       |       | ○    |      | ○   |        |       |     |     |      |      |
| 17               |       |    | ○     |    |       |       | ○    |       |       |      |         | ○   |     |      |       |       |      |      |     |        | ○     |     |     |      |      |
| 18               |       |    | ○     |    | ○     | ○     |      |       |       |      |         |     |     |      |       |       | ○    |      |     |        |       |     |     |      |      |
| 19               |       |    | ○     |    | ○     | ○     | ○    |       |       |      | ○       |     |     |      | ○     |       |      |      |     | ○      |       |     |     |      |      |
| 20               |       |    | ○     |    | ○     | ○     | ○    |       | ○     |      |         |     | ○   |      |       |       | ○    |      |     |        |       |     |     |      |      |
| 21               |       |    | ○     |    |       | ○     | ○    |       |       |      |         |     | ○   |      |       |       |      |      | ○   |        |       |     |     |      |      |
| 24               |       |    |       | ○  |       |       |      |       |       | ○    |         |     | ○   |      |       |       |      |      | ○   |        |       |     |     |      |      |
| 35               |       |    |       | ○  |       | ○     |      |       |       | ○    |         |     | ○   |      |       |       |      |      | ○   |        |       |     | ○   |      |      |
| 36               |       |    |       | ○  |       | ○     |      |       |       | ○    |         |     |     |      |       |       |      |      | ○   |        |       |     |     |      |      |
| 37               |       |    |       | ○  |       | ○     | ○    |       |       | ○    |         |     |     |      |       |       |      |      | ○   |        |       |     |     | ○    |      |
| 38               |       |    |       | ○  |       | ○     | ○    |       |       |      |         |     | ○   |      |       |       | ○    |      | ○   |        |       |     |     |      |      |
| 22               |       |    |       | ○  | ○     |       |      |       |       |      |         | ○   | ○   |      |       | ○     |      |      |     |        | ○     |     |     |      |      |
| 23               |       |    |       | ○  |       |       |      |       |       | ○    |         |     | ○   |      |       |       |      |      | ○   |        |       |     |     |      |      |
| 24               |       |    |       | ○  |       |       |      |       |       | ○    |         |     |     |      |       |       |      |      | ○   |        |       |     |     |      |      |
| 25               |       |    |       | ○  | ○     | ○     | ○    |       |       | ○    |         | ○   | ○   |      |       |       |      |      | ○   |        |       |     |     |      |      |
| 26               |       |    |       | ○  | ○     | ○     |      |       | ○     |      |         |     | ○   |      |       |       | ○    |      |     |        | ○     | ○   |     |      |      |
| 27               |       |    |       | ○  |       | ○     | ○    | ○     |       |      |         | ○   | ○   | ○    |       | ○     | ○    |      |     |        |       | ○   |     | ○    | ○    |
| 28               |       |    |       | ○  | ○     | ○     |      |       |       |      |         |     | ○   |      |       | ○     | ○    | ○    | ○   |        |       |     |     |      |      |
| 29               |       |    |       | ○  | ○     |       |      |       |       | ○    |         |     |     |      | ○     |       |      |      | ○   |        |       |     |     |      |      |
| 30               |       |    |       | ○  | ○     | ○     | ○    |       |       |      |         |     | ○   |      |       |       |      |      |     |        |       |     |     |      |      |

348 Open circles indicate genes that were upregulated on day 7 (d7) or d14 compared with d0 [log fold  
 349 change (FC) >1,  $p < 0.01$ , false discovery rate (FDR) < 0.05), whereas crosses indicate genes that were  
 350 not upregulated.

351

352 Our d7 and d14 cells expressed typical NC markers, such as *Ngfr*, *Snai1*, and *Snai2*. In  
353 contrast, the mouse cNCC line (O9-1 cells) did not express *Ngfr*, indicating that cNCCs derived  
354 from miPS cells may be of better quality for evaluating the cNCC characteristics than O9-1 cells  
355 [59]. We also found that, unlike O9-1 cells, d14 cells expressed considerably high levels of *Sox10*,  
356 which is considered as a reliable marker for migratory cNCCs. Because cNCCs are involved in  
357 organizing numerous craniofacial tissues, several reports are available on their gene expression  
358 profiles; however, we found that various results that have been reported were inconsistent  
359 between the species and protocols. Since cNCCs differentiate fast in the embryo [14], it is  
360 considerably difficult to synchronize the timing of isolation to a particular point in their  
361 development. Furthermore, migratory cNCCs intermingle with other types of cells in the embryo,  
362 making it difficult to isolate and characterize a pure cell population. Consequently, there have  
363 been few reports of cNCC markers [16,60–71]; however, Simoes-Costa et al. [16] successfully  
364 isolated *Sox10* positive cNCCs in a chicken embryo and analyzed their gene profiles and we found  
365 that d14 cells expressed several of these *Sox10* positive chicken cNCCs. It has previously been  
366 suggested that NC cells have multiple populations [11] and that the generation of cNCCs from  
367 iPS cells could result in numerous different populations occurring in the same dish. Therefore,  
368 this diversity in populations may explain the discrepancies; however, we can conclude that under  
369 the conditions used in the present study, *cMyc*; *Ets1*; *Sox10*; *Adamts2*; *Adamts8*; *Pcdha2*, -5, -7, -

370 *11*, and-*12*; *Pcdhac1*, and *Pcdhgc3* may represent useful markers for migratory cNCCs.

371 Our results also indicated that d7 cells were still in the premigratory stage even though they  
372 expressed numerous NC markers. Thus, cNCCs derived from miPS cells took more than 14 days  
373 to become migratory *in vitro*, which is much slower than has been observed in the mouse embryos  
374 *in vivo* under the same conditions [113].

375 RNA-seq makes it possible to normalize the expression levels of different genes, allowing  
376 comparisons between samples. We conducted triplicate experiments in which none of the induced  
377 cNCCs expressed several homeobox genes that are considered to be expressed in the early stages  
378 of cNCC differentiation. In particular, we did not observe *FoxD3* expression in either d7 or d14  
379 cells, despite it being recognized as one of the key transcription factors in cNCCs [53]. These  
380 negative results indicate that cNCCs derived from miPS cells may have distinct gene regulatory  
381 networks. Although it is possible that the cells would express those genes at different time points,  
382 the expression of *FoxD3*, which is a pluripotent stem cell marker gene and plays an important  
383 role in maintaining pluripotency, decreases in a time-dependent manner [44], making it more  
384 likely that *FoxD3* may not be a key regulator in iPS-derived cNCCs. We speculate, however, that  
385 iPS cells had a sufficient amount of *FoxD3* to allow them to be converted from iPS cells into  
386 cNCCs.

387 Protocadherins belong to the cadherin superfamily and are involved in intercellular

388 interactions [57], while metzincins are thought to be key proteinases that facilitate the cell  
389 migration [45]. Unfortunately, the abundances of members of these families hindered their  
390 analysis; however, since RNA-seq techniques enable us to evaluate the gene profiles exhaustively,  
391 we were able to focus on the expressions of all of the procadherin and metazicin family members.  
392 As expected, we found that several *Adam* and *Adamts* genes were upregulated, with most of the  
393 latter increasing significantly. The *Adam* genes that increased in the cNCCs were the membrane-  
394 bound type; whereas, the *Adamts* genes were secreted proteinases, indicating that the expression  
395 of various *Adamts* may allow the matrix to be digested more efficiently, as each may be capable  
396 of digesting a different type of extracellular matrix protein [45]. Thus, the secretion of a variety of  
397 Adamts and Pcdh proteins may play a crucial role in the migration ability of cNCCs.

398 In summary, we successfully induced the formation of cNCCs from miPS cells by placing  
399 them in NC inducing media for 14 days. We found that although the resulting cNCCs had several  
400 NC specifiers, some were lacking, indicating that a distinct molecular network may control the  
401 gene expression in miPS-derived cNCCs. Our results also indicated that *cMyc*; *Ets1*; *Sox10*;  
402 *Adamts2* and *-8*; *Pcdha2*, *-5*, *-7*, *-11*, and *-12*; *Pcdhac1*; and *Pcdhgc3* may represent appropriate  
403 markers for migratory cNCCs induced from miPS cells. Eventually, these cNCCs produced a  
404 broad spectrum of Adamts family proteins that may play an important role in their migration.

405

## 406 **Acknowledgments**

407 The author is grateful to Professor T. Azuma, MD, PhD, Department of Biochemistry, and  
408 Professor T. Ichinohe, DDS, PhD, Department of Dental Anesthesiology, for their guidance. I  
409 also thank S. Onodera and A. Saito, Department of Biochemistry.

410

## 411 **Conflict of interest**

412 The authors have no conflicts of interest directly relevant to the content of this article.

413

## 414 **References**

- 415 1. Luan X, Dangaria S, Ito Y, Walker CG, Jin T, Schmidt MK et al. Neural crest lineage  
416 segregation: a blueprint for periodontal regeneration. *J Dent Res.* 2009; 88: 781–791.  
417 <https://doi.org/10.1177/0022034509340641> PMID: 19767574
- 418 2. Malhotra N. Induced Pluripotent Stem (iPS) Cells in Dentistry: A Review, *Int J Stem Cells.*  
419 2016; 9: 176–185. <https://doi.org/10.15283/ijsc16029> PMID: 27572712
- 420 3. Knight RD, Schilling TF. Cranial neural crest and development of the head skeleton. *Adv*  
421 *Exp*  
422 *Med Biol.* 2006; 589: 120–133. <https://doi.org/10.1007/978-0-387-46954-67> PMID:  
423 17076278
- 424 4. Theveneau E, Mayor R. Collective cell migration of the cephalic neural crest: the art of  
425 integrating information. *Genesis.* 2011; 49: 164-176. <https://doi.org/10.1002/dvg.20700>  
426 PMID: 21157935
- 427 5. Chai Y, Jiang X, Ito Y, Bringas P Jr, Han J, Rowitch DH et al. Fate of the mammalian  
428 cranial neural crest during tooth and mandibular morphogenesis. *Development.* 2000; 127:  
429 1671–1679. PMID: 10725243
- 430 6. McConnell AM, Mito IK, Ablain J, Dang M, Formichella L, Fisher DE et al. Neural  
431 crest state activation in NRAS driven melanoma, but not in NRAS-driven melanocyte

- 432 expansion. *Dev Biol.* 2018. <https://doi.org/10.1016/j.ydbio.2018.05.026> PMID: 29883661
- 433 7. Meulemans D, Bronner-Fraser M. Gene- regulatory interactions in neural crest evolution and  
434 Development. *Dev Cell.* 2004; 7: 291–299. <https://doi.org/10.1016/j.devcel.2004.08.007>  
435 PMID: 15363405
- 436 8. Steventon B, Carmona-Fontaine C, Mayor R. Genetic network during neural crest induction:  
437 from cell specification to cell survival. *Semin Cell Dev Biol.* 2005; 16: 647–654.  
438 <https://doi.org/10.1016/j.semcdb.2005.06.001> PMID: 16084743
- 439 9. Simões-Costa M, Bronner ME. Establishing neural crest identity: a gene regulatory recipe.  
440 *Development.* 2015; 142: 242–257. <https://dx.doi.org/10.1242/dev.105445> PMID:  
441 25564621
- 442 10. Martik ML, Bronner ME. Regulatory Logic Underlying Diversification of the Neural Crest.  
443 *Trends Genet.* 2017; 33: 715–727. <https://doi.org/10.1016/j.tig.2017.07.015> PMID:  
444 28851604
- 445 11. Minoux M, Rijli FM. Molecular mechanisms of cranial neural crest cell migration and  
446 patterning in craniofacial development. *Development.* 2010; 137: 2605–2621.  
447 <https://doi.org/10.1242/dev.040048> PMID: 20663816
- 448 12. Mayor R, Theveneau E. The neural crest. *Development.* 2013; 140: 2247–2251.  
449 <https://doi.org/10.1242/dev.091751> PMID: 23674598

- 450 13. Okuno H, Mihara FR, Ohta S, Fukuda K, Kurosawa K, Akamatsu W et al. CHARGE  
451 syndrome modeling using patient-iPSCs reveals defective migration of neural crest cells  
452 harboring CHD7 mutations. *eLife*. 2017; 6: e21114  
453 <https://dx.doi.org/10.7554/eLife.21114> PMID: 29179815
- 454 14. Simoes-Costa M, Bronner ME. Reprogramming of avian neural crest axial identity and cell  
455 fate. *Science*. 2016; 352: 1570-1573. <https://dx.doi.org/10.1126/science.aaf2729> PMID:  
456 27339986
- 457 15. Milet C, Monsoro-Burq AH. Neural crest induction at the neural plate border in vertebrates.  
458 *Dev Biol*. 2012; 366: 22–33. <https://doi.org/10.1016/j.ydbio.2012.01.013> PMID: 22305800
- 459 16. Simões-Costa M, Tan-Cabugao J, Antoshechkin I, Sauka-Spengler T, Bronner ME.  
460 Transcriptome analysis reveals novel players in the cranial neural crest gene regulatory  
461 Network. *Genome Res*. 2014; 24: 281–290. <https://doi.org/10.1101/gr.161182.113> PMID:  
462 24389048
- 463 17. Mizuseki K, Sakamoto T, Watanabe K, Muguruma K, Ikeya M, Nishiyama A et al.  
464 Generation of neural crest-derived peripheral neurons and floor plate cells from mouse and  
465 primate embryonic stem cells. *Proc Natl Acad Sci U S A*. 2003; 100: 5828–5833.  
466 <https://dx.doi.org/10.1073/pnas.1037282100> PMID: 12724518
- 467 18. Motohashi T, Aoki H, Chiba K, Yoshimura N, Kunisada T. Multipotent Cell Fate of Neural



- 468 Crest-Like Cells Derived from Embryonic Stem Cells. *Stem Cells*. 2007; 25: 402–412.
- 469 <https://doi.org/10.1634/stemcells.2006-0323> PMID: 17038669
- 470 19. Kawaguchi J, Nichols J, Gierl MS, Faial T, Smith A. Isolation and propagation of enteric  
471 neural crest progenitor cells from mouse embryonic stem cells and embryos. *Development*.  
472 2010; 137: 693–704. [https://dx.doi.org/10.1242%2Fdev.046896](https://dx.doi.org/10.1242/dev.046896) PMID: 20147374
- 473 20. Aihara Y, Hayashi Y, Hirata M, Ariki N, Shibata S, Nagoshi N et al. Furue, Induction of  
474 neural crest cells from mouse embryonic stem cells in a serum-free monolayer culture. *Int J*  
475 *Dev Biol*. 2010; 154: 1287–1294. <https://doi.org/10.1387/ijdb.103173ya> PMID: 20711997
- 476 21. Minamino Y, Ohnishi Y, Kakudo K, Nozaki M. Isolation and propagation of neural crest  
477 stem cells from mouse embryonic stem cells via cranial neurospheres. *Stem Cells Dev*.  
478 2015; 24: 172–181. <https://doi.org/10.1089/scd.2014.0152> PMID: 25141025
- 479 22. Pomp O, Brokhman I, Ben-Dor I, Reubinoff B, Goldstein RS. Generation of peripheral  
480 sensory and sympathetic neurons and neural crest cells from human embryonic stem cells.  
481 *Stem cells*. 2005; 23: 923–930. <https://doi.org/10.1634/stemcells.2005-0038> PMID:  
482 15883233
- 483 23. Lee G, Kim H, Elkabetz Y, Al Shamy G, Panagiotakos G, Barberi T et al. Isolation and  
484 directed differentiation of neural crest stem cells derived from human embryonic  
485 stem cells. *Nat Biotechnol*. 2007; 25: 1468–1475. <https://doi.org/10.1038/nbt1365> PMID:

486 18037878

487 24. Lee G, Chambers SM, Tomishima MJ, Studer. Derivation of neural crest cells from human  
488 pluripotent stem cells. Nat Protoc. 5 (2010) 688–701. <https://doi.org/10.1038/nprot.2010.35>  
489 PMID: 20360764

490 25. Liu Q, Spusta SC, Mi R, Lassiter RN, Stark MR, Höke A et al. Human neural crest stem  
491 cells derived from human ESCs and induced pluripotent stem cells: induction, maintenance,  
492 and differentiation into functional schwann cells. Stem Cells Transl Med. 2010; 1: 266–278.  
493 <https://doi.org/10.5966/sctm.2011-0042> PMID: 23197806

494 26. Noisa P, Lund C, Kanduri K, Lund R, Lähdesmäki H, Lahesmaa R et al. Notch signaling  
495 regulates the differentiation of neural crest from human pluripotent stem cells. J Cell Sci.  
496 2014; 127: 2083–2094. <https://doi.org/10.1242/jcs.145755> PMID: 24569875

497 27. Karbalaie K, Tanhaei S, Rabiei F, Kiani-Esfahani A, Masoudi NS, Nasr-Esfahani MH et al.  
498 Stem cells from human exfoliated deciduous tooth exhibit stromal-derived inducing activity  
499 and lead to generation of neural crest cells from human embryonic stem cells. Cell J. 2015;  
500 17: 37–48. <https://dx.doi.org/10.22074%2Fcellj.2015.510> PMID: 25870833

501 28. Avery J, Dalton S. Methods for Derivation of Multipotent Neural Crest Cells Derived from  
502 Human Pluripotent Stem Cells. Methods Mol Biol. 2016; 1341: 197–208.  
503 [https://dx.doi.org/10.1007%2F7651\\_2015\\_234](https://dx.doi.org/10.1007%2F7651_2015_234) PMID: 25986498

- 504 29. Zhang JT, Weng ZH, Tsang KS, Tsang LL, Chan HC, Jiang XH. MycN Is Critical for the  
505 Maintenance of Human Embryonic Stem Cell-Derived Neural Crest Stem Cells. PLoS  
506 One; 2016: e0148062. <https://doi.org/10.1371/journal.pone.0148062> PMID: 26815535
- 507 30. Lovatt M, Yam GH, Peh GS, Colman A, Dunn NR, Mehta JS. Directed differentiation of  
508 periocular mesenchyme from human embryonic stem cells. Differentiation. 2018; 99: 62–  
509 69. <https://doi.org/10.1016/j.diff.2017.11.003> PMID: 29239730
- 510 31. Doi D, Samata B, Katsukawa M, Kikuchi T, Morizane A, Ono Y et al. Isolation of human  
511 induced pluripotent stem cell derived dopaminergic progenitors by cell sorting for successful  
512 transplantation. Stem Cell Reports. 2014; 3: 337–350.  
513 <https://dx.doi.org/10.1016%2Fj.stemcr.2014.01.013> PMID: 24672756
- 514 32. Nakane T, Masumoto H, Tinney JP, Yuan F, Kowalski WJ, Ye F et al. Impact of Cell  
515 Composition and Geometry on Human Induced Pluripotent Stem Cells-Derived  
516 Engineered Cardiac Tissue. Sci Rep. 2017; 7: 45641.  
517 <https://dx.doi.org/10.1038%2Fsrep45641> PMID: 28368043
- 518 33. Okawa T, Kamiya H, Himeno T, Kato J, Seino Y, Fujiya A. Transplantation of Neural Crest  
519 Like Cells Derived From Induced Pluripotent Stem Cells Improves Diabetic Polyneuropathy  
520 in Mice. Cell Transplant. 2013; 22: 1767–1783. <https://doi.org/10.3727/096368912X657710>  
521 PMID: 23051637

- 522 34. Seki D, Takeshita N, Oyanagi T, Sasaki S, Takano I, Hasegawa M et al. Differentiation of  
523 Odontoblast-Like Cells From Mouse Induced Pluripotent Stem Cells by Pax9 and Bmp4  
524 Transfection Stem Cells. *Transl Med.* 2015; 4: 993–997.  
525 <https://dx.doi.org/10.5966%2Fscem.2014-0292> PMID: 26136503
- 526 35. Wang A, Tang X, Li X, Jiang Y, Tsou DA, Li S. Derivation of smooth muscle cells with  
527 neural crest origin from human induced pluripotent stem cells. *Cells Tissues Organs.*  
528 2012; 195: 5–14. <https://doi.org/10.1002/jcp.25437> PMID: 22005509
- 529 36. Kreitzer FR, Salomonis N, Sheehan A, Huang M, Park JS, Spindler MJ et al. A robust  
530 method to derive functional neural crest cells from human pluripotent stem cells. *Am J Stem*  
531 *Cells.* 2013; 2: 119–131. PMID: 23862100
- 532 37. Tomokiyo A, Hynes K, Ng J, Menicanin D, Camp E, Arthur A et al. Generation of Neural  
533 Crest-Like Cells From Human Periodontal Ligament Cell-Derived Induced Pluripotent Stem  
534 Cells. *J Cell Physiol.* 2017; 232: 402–416. <https://doi.org/10.1002/jcp.25437> PMID:  
535 27206577
- 536 38. Michael D, Wagoner MD, Bohrer LR, Aldrich BT, Greiner MA, Mullins RF et al.  
537 Feeder-free differentiation of cells exhibiting characteristics of corneal endothelium from  
538 human induced pluripotent stem cells. *Biol Open.* 2018; 7: 5.  
539 <http://dx.doi.org/10.1242/bio.032102> PMID: 29685994

- 540 39. Bajpai R, Chen DA, Rada-Iglesias A, Zhang J, Xiong Y, Helms J et al. CHD7 cooperates  
541 with PBAF to control multipotent neural crest formation. *Nature*. 2010; 463: 958–962.  
542 <https://doi.org/10.1038/nature08733> PMID: 20130577
- 543 40. Gallego RI, Pai AA, Tung J, Gilad Y. RNA-seq: impact of RNA degradation on transcript  
544 quantification. *BMC Biol*. 2014; 12: 42. <https://dx.doi.org/10.1186%2F1741-7007-12-42>  
545 PMID: 24885439
- 546 41. Wang Z, Gerstein M, Snyder M. RNA-Seq: a revolutionary tool for transcriptomics. *Nat*  
547 *Rev*  
548 *Genet*. 2009; 10: 57–63. <https://doi.org/10.1038/nrg2484> PMID: 19015660
- 549 42. Mortazavi A, Williams BA, McCue K, Schaeffer L, Wold B. Mapping and quantifying  
550 mammalian transcriptomes by RNA-Seq. *Nat Methods*. 2008; 5: 621–628.  
551 <https://doi.org/10.1038/nmeth.1226> PMID: 18516045
- 552 43. Sauka-Spengler T, Meulemans D, Jones M, Bronner-Fraser M. Ancient evolutionary origin  
553 of the neural crest gene regulatory network. *Dev Cell*. 2007; 13: 405–420.  
554 <https://doi.org/10.1016/j.devcel.2007.08.005> PMID: 17765683
- 555 44. Nikitina N, Sauka-Spengler T, Bronner-Fraser M. Dissecting early regulatory relationships  
556 in the lamprey neural crest gene network. *Proc Natl Acad Sci U S A*. 2008; 105: 20083  
557 20088. <https://dx.doi.org/10.1073%2Fpnas.0806009105> PMID: 19104059

- 558 45. Khudyakov J, Bronner-Fraser M. Comprehensive spatiotemporal analysis of early chick  
559 neural crest network genes. *Dev Dyn.* 2009; 238: 716–723.  
560 <https://doi.org/10.1002/dvdy.21881> PMID: 19235729
- 561 46. Hill RE, Jones PF, Rees AR, Sime CM, Justice MJ, Copeland NG et al. A new family of  
562 mouse homeo box-containing genes: molecular structure, chromosomal location, and  
563 developmental expression of Hox-7.1. *Genes Dev.* 1989; 3: 26–37. PMID: 2565278
- 564 47. Suzuki A, Ueno N, Hemmati-Brivanlou A. *Xenopus msx1* mediates epidermal induction  
565 and  
566 neural inhibition by BMP4. *Development.* 1997; 124: 3037–3044. PMID: 9272945
- 567 48. Simões-Costa M, McKeown SJ, Tan-Cabugao J, Sauka-Spengler T, Bronner ME. Dynamic  
568 and differential regulation of stem cell factor FoxD3 in the neural crest is Encrypted in the  
569 genome. *PLoS Genet.* 2012; 8: e1003142. <https://doi.org/10.1371/journal.pgen.1003142>  
570 PMID: 23284303
- 571 49. Goulding MD, Chalepakis G, Deutsch U, Erselius JR, Gruss P. Pax-3, a novel murine DNA  
572 binding protein expressed during early neurogenesis. *EMBO J.* 1991; 10: 1135–1147.  
573 PMID: 202218
- 574 50. Bang AG, Papalopulu N, Goulding MD, Kintner C. Expression of Pax-3 in the lateral neural  
575 plate is dependent on a Wnt- mediated signal from posterior nonaxial mesoderm. *Dev Biol.*

- 576 1991; 212: 366–380. <https://doi.org/10.1006/dbio.1999.9319> PMID: 10433827
- 577 51. Alkobtawi M, Ray H, Barriga EH, Moreno M, Kerney R, Monsoro-Burq AH et al.
- 578 Characterization of Pax3 and Sox10 transgenic *Xenopus laevis* embryos as tools to study
- 579 neural crest development. *Dev Biol.* 2018; 17: <https://doi.org/10.1016/j.ydbio.2018.02.020>
- 580 PMID: 29522707
- 581 52. Maczkowiak F, Matéos S, Wang E, Roche D, Harland R, Monsoro-Burq AH. The Pax3 and
- 582 Pax7 paralogs cooperate in neural and neural crest patterning using distinct molecular
- 583 mechanisms, in *Xenopus laevis* embryos. *Dev Biol.* 2010; 340: 381–396.
- 584 <https://doi.org/10.1016/j.ydbio.2010.01.022> PMID: 20116373
- 585 53. Krishnakumar R, Chen AF, Pantovich MG, Danial M, Parchem RJ, Labosky PA et al.
- 586 FOXD3 Regulates Pluripotent Stem Cell Potential by Simultaneously Initiating and
- 587 Repressing Enhancer Activity. *Cell Stem Cell.* 2016; 18: 104–117.
- 588 <https://doi.org/10.1016/j.stem.2015.10.003> PMID: 26748757
- 589 54. Desanlis I, Felstead HL, Edwards DR, Wheeler GN. ADAMTS9, a member of the
- 590 ADAMTS family, in *Xenopus* development. *Gene Expr Patterns.* 2018; 29: 72–81.
- 591 <https://doi.org/10.1016/j.gep.2018.06.001> PMID: 29935379
- 592 55. Porter S, Clark IM, Kevorkian L, Edwards DR. The ADAMTS metalloproteinases. *Biochem*
- 593 *J.* 2005; 386: 15–27. <https://doi.org/10.1042/BJ20040424> PMID: 15554875

- 594 56. Hubmacher D, Apte SS. ADAMTS proteins as modulators of microfibril formation and  
595 function. *Matrix Biol.* 2015; 47: 34–43. <https://doi.org/10.1016/j.matbio.2015.05.004>  
596 PMID: 25957949
- 597 57. Chen WV, Maniatis T. Clustered protocadherins. *Development.* 2013; 140: 3297–302.  
598 <https://doi.org/10.1242/dev.090621> PMID: 23900538
- 599 58. Okita K, Ichisaka T, Yamanaka S. Generation of germline competent induced pluripotent  
600 stem cells. *Nature.* 2007; 448: 313–317. <https://doi.org/10.1038/nature05934>  
601 PMID: 17554338
- 602 59. Ishii M, Arias AC, Liu L, Chen YB, Bronner ME, Maxson RE. A stable cranial neural crest  
603 cell line from mouse. *Stem Cells Dev.* 2012; 21: 3069–3080.  
604 <https://doi.org/10.1089/scd.2012.0155> PMID: 22889333
- 605 60. Antonellis A, Bennett WR, Menheniott TR, Prasad AB, Lee-Lin SQ; NISC Comparative  
606 Sequencing Program et al. Deletion of long-range sequences at Sox10 compromises  
607 developmental expression in a mouse model of Waardenburg-Shah (WS4) syndrome. *Hum*  
608 *Mol Genet.* 2006; 15: 259–271. <https://doi.org/10.1093/hmg/ddi442> PMID: 16330480
- 609 61. Betancur P, Bronner-Fraser M, Sauka-Spengler T. Genomic code for Sox10 activation  
610 reveals a key regulatory enhancer for cranial neural crest. *Proc Natl Acad Sci U S A.* 2010;  
611 107: 3570–3575. <https://doi.org/10.1073/pnas.0906596107> PMID: 20139305



- 612 62. Rinon A, Molchadsky A, Nathan E, Yovel G, Rotter V, Sarig R et al. p53 coordinates  
613 cranial neural crest cell growth and epithelial-mesenchymal transition/delamination  
614 processes. *Development*. 2011; 138: 1827–1838. <https://doi.org/10.1242/dev.053645>  
615 PMID: 21447558
- 616 63. Hari L, Miescher I, Shakhova O, Suter U, Chin L, Taketo M et al. Temporal control  
617 of neural crest lineage generation by Wnt/ $\beta$ -catenin signaling. *Development*. 2012; 139:  
618 2107–2117. <https://doi.org/10.1242/dev.073064> PMID: 22573620
- 619 64. Murko C, Bronner ME. Tissue specific regulation of the chick Sox10E1 enhancer by  
620 different Sox family members. *Dev Biol*. 2016; 422: 47–57.  
621 <https://doi.org/10.1016/j.ydbio.2016.12.004> PMID: 28012818
- 622 65. Spokony RF, Aoki Y, Saint-Germain N, Magner-Fink E, Saint-Jeannet JP. The transcription  
623 factor Sox9 is required for cranial neural crest development in *Xenopus*. *Development*.  
624 2002; 129: 421–432. PMID: 11807034
- 625 66. Perez-Alcala S, Nieto MA, Barbas JA. LSox5 regulates RhoB expression in the neural tube  
626 and promotes generation of the neural crest. *Development*. 2004; 131: 4455–4465.  
627 <https://doi.org/10.1242/dev.01329> PMID: 15306568
- 628 67. Barembaum M, Bronner ME. Identification and dissection of a key enhancer mediating  
629 cranial neural crest specific expression of transcription factor, Ets-1. *Dev Biol*. 2013; 382:

- 630 567-575. <https://dx.doi.org/10.1016%2Fj.ydbio.2013.08.009> PMID: 23969311
- 631 68. Nagai T, Aruga J, Takada S, Günther T, Spörle R, Schughart K et al. The expression of the  
632 mouse *Zic1*, *Zic2*, and *Zic3* gene suggests an essential role for *Zic* genes in body pattern  
633 formation. *Dev Biol.* 1997; 182: 299–313. <https://doi.org/10.1006/dbio.1996.8449>  
634 PMID: 9070329
- 635 69. Teslaa JJ, Keller AN, Nyholm MK, Grinblat Y. Zebrafish *Zic2a* and *Zic2b* regulate neural  
636 crest and craniofacial development. *Dev Biol.* 2013; 380: 73–86.  
637 <https://doi.org/10.1016/j.ydbio.2013.04.033> PMID: 23665173
- 638 70. Das A, Crump JG. *Bmps* and *id2a* act upstream of *Twist1* to restrict ectomesenchyme  
639 potential of the cranial neural crest. *PLoS Genet.* 2012; 8: e1002710.  
640 <https://doi.org/10.1371/journal.pgen.1002710> PMID: 22589745
- 641 71. Machon O, Masek J, Machonova O, Krauss S, Kozmik Z. *Meis2* is essential for cranial and  
642 cardiac neural crest development. *BMC Dev Biol.* 2015;15. [https://doi.org/10.1186/s12861-](https://doi.org/10.1186/s12861-015-0093-6)  
643 [015-0093-6](https://doi.org/10.1186/s12861-015-0093-6) PMID: 26545946
- 644 72. Mitchell PJ, Timmons PM, Hébert JM, Rigby PW, Tjian R. Transcription factor AP-2  
645 is expressed in neural crest cell lineages during mouse embryogenesis. *Genes Dev.* 1991; 5:  
646 105–119. PMID: 1989904
- 647 73. Shen H, Wilke T, Ashique AM, Narvey M, Zerucha T, Savino E. Chicken transcription

- 648 factor AP-2: cloning, expression and its role in outgrowth of facial prominences and limb  
649 buds. *Dev Biol.* 1997; 188: 248–266. <https://doi.org/10.1006/dbio.1997.8617> PMID:  
650 9268573
- 651 74. Luo T, Lee YH, Saint-Jeannet JP, Sargent TD. Induction of neural crest in *Xenopus* by  
652 transcription factor AP2alpha. *Proc Natl Acad Sci U S A.* 2003; 100: 532–537.  
653 <https://doi.org/10.1073/pnas.0237226100> PMID: 12511599
- 654 75. de Croz  N, Maczkowiak F, Monsoro-Burq AH. Reiterative AP2a activity controls  
655 sequential steps in the neural crest gene regulatory network. *Proc Natl Acad Sci U S A.*  
656 2011; 108: 155–160. <https://dx.doi.org/10.1073/pnas.1010740107> PMID: 21169220
- 657 76. Wang WD, Melville DB, Montero-Balaguer M, Hatzopoulos AK, Knapik EW. Tfp2a and  
658 Foxd3 regulate early steps in the development of the neural crest progenitor population.  
659 *Dev Biol.* 2011; 360: 173–185. <https://doi.org/10.1016/j.ydbio.2011.09.019> PMID:  
660 21963426
- 661 77. Powell DR, Hernandez-Lagunas L, LaMonica K, Artinger KB. Prdm1a directly activates  
662 foxd3 and tfp2a during zebrafish neural crest specification. *Development.* 2013; 140:  
663 3445–3455. <https://doi.org/10.1242/dev.096164> PMID: 23900542
- 664 78. Yang L, Zhang H, Hu G, Wang H, Abate-Shen C, Shen MM. An early phase of embryonic  
665 Dlx5 expression defines the rostral boundary of the neural plate. *J Neurosci.* 1998; 18:

- 666 8322–8330. PMID: 9763476
- 667 79. Luo T, Matsuo-Takasaki M, Lim JH, Sargent TD. Differential regulation of Dlx gene  
668 expression by a BMP morphogenetic gradient. *Int J Dev Biol.* 2001; 45: 681–684.  
669 PMID:11461005
- 670 80. Li B, Kuriyama S, Moreno M, Mayor R. The posteriorizing gene Gbx2 is a direct target of  
671 Wnt signalling and the earliest factor in neural crest induction. *Development.* 2009; 136:  
672 3267–3278. <https://doi.org/10.1242/dev.036954> PMID: 19736322
- 673 81. Nakata K, Nagai T, Aruga J, Mikoshiba K. Xenopus Zic family and its role in neural crest  
674 development. *Mech Dev.* 1998; 75: 43–51. [https://doi.org/10.1016/S0925-4773\(98\)00073](https://doi.org/10.1016/S0925-4773(98)00073)  
675 PMID: 9739105
- 676 82. Dottori M, Gross MK, Labosky P, Goulding M. The winged helix transcription  
677 factor Foxd3 suppresses interneuron differentiation and promotes neural crest cell fate.  
678 *Development.* 2001; 128: 4127–4138. PMID: 11684651
- 679 83. Kos R, Reedy MV, Johnson RL, Erickson CA. The winged-helix transcription factor FoxD3  
680 is important for establishing the neural crest lineage and repressing melanogenesis in avian  
681 embryos. *Development.* 2001; 128: 1467–1479. PMID: 11262245
- 682 84. Wilson YM, Richards KL, Ford-Perriss ML, Panthier JJ, Murphy M. Neural crest cell  
683 lineage segregation in the mouse neural tube. *Development.* 2004; 131: 6153–6162.

- 684 <https://doi.org/10.1242/dev.01533> PMID: 15548576
- 685 85. Liu L, Chong SW, Balasubramaniyan NV, Korzh V, Ge R. Platelet-derived growth factor  
686 receptor alpha (pdgfr- $\alpha$ ) gene in zebrafish embryonic development. *Mech Dev.* 2002; 116:  
687 227–230. [https://doi.org/10.1016/S0925-4773\(02\)00142-9](https://doi.org/10.1016/S0925-4773(02)00142-9) PMID: 12128230
- 688 86. Liu KJ, Harland RM. Cloning and characterization of *Xenopus* Id4 reveals differing roles  
689 for Id genes. *Dev Biol.* 2003; 264: 339–351. <https://doi.org/10.1016/j.ydbio.2003.08.017>  
690 PMID: 14651922
- 691 87. Figueiredo AL, Maczkowiak F, Borday C, Pla P, Sittewelle M, Pegoraro C et al. PFKFB4  
692 control of AKT signaling is essential for premigratory and migratory neural crest formation.  
693 *Development.* 2017; 144: 4183–4194. <https://doi.org/10.1242/dev.157644> PMID: 29038306
- 694 88. Yang X, Li J, Zeng W, Li C, Mao B. Elongator Protein 3 (Elp3) stabilizes Snail1 and  
695 regulates neural crest migration in *Xenopus*. *Sci Rep.* 2016; 6: 26238.  
696 <https://doi.org/10.1038/srep26238> PMID: 27189455
- 697 89. Sefton M, Sánchez S, Nieto MA. Conserved and divergent roles for members of the Snail  
698 family of transcription factors in the chick and mouse embryo. *Development.* 1998; 125:  
699 3111–3121. PMID: 9671584
- 700 90. del Barrio MG, Nieto MA. Overexpression of Snail family members highlights their ability  
701 to promote chick neural crest formation. *Development.* 2002; 129: 1583–1593. PMID:

- 702 11923196
- 703 91. Aybar MJ, Nieto MA, Mayor R. Snail precedes Slug in the genetic cascade required for the  
704 specification and migration of the *Xenopus* neural crest. *Development*. 2003; 130: 483–494.  
705 <http://doi.org/10.1242/dev.00238> PMID: 12490555
- 706 92. Nieto MA, Sargent MG, Wilkinson DG, Cooke J. Control of cell behavior during vertebrate  
707 development by Slug, a zinc finger gene. *Science*. 1994; 264: 835–859.  
708 <http://doi.org/10.1126/science.7513443> PMID: 7513443
- 709 93. Jiang R, Lan Y, Norton CR, Sundberg JP, Gridley T. The Slug gene is not essential for  
710 mesoderm or neural crest development in mice. *Dev Biol*. 1998; 198: 277–285.  
711 [https://doi.org/10.1016/S0012-1606\(98\)80005-5](https://doi.org/10.1016/S0012-1606(98)80005-5) PMID: 9659933
- 712 94. Tien CL, Jones A, Wang H, Gerigk M, Nozell S, Chang C. Snail2/Slug cooperates with  
713 Polycomb repressive complex 2 (PRC2) to regulate neural crest development.  
714 *Development*. 2015; 142: 722–731. <https://doi.org/10.1242/dev.111997> PMID: 25617436
- 715 95. Martin BL, Harland PM. Hypaxial muscle migration during primary myogenesis in *Xenopus*  
716 *laevis*. *Dev Biol*. 2001; 239: 270–280. <https://doi.org/10.1006/dbio.2001.0434> PMID:  
717 11784034
- 718 96. Cheung M, Briscoe J. Neural crest development is regulated by the transcription factor  
719 Sox9. *Development*. 2003; 130: 5681–5693. <https://doi.org/10.1242/dev.00808> PMID:

- 720 14522876
- 721 97. Cheung M, Chaboissier MC, Mynett A, Hirst E, Schedl A, Briscoe J. The transcriptional  
722 control of trunk neural crest induction, survival, and delamination. *Dev Cell*. 2005; 8: 179–  
723 192. <https://doi.org/10.1016/j.devcel.2004.12.010> PMID: 15691760
- 724 98. Honoré SM, Aybar MJ, Mayor R. Sox10 is required for the early development of the  
725 prospective neural crest in *Xenopus* embryos. *Dev Biol*. 2003; 260: 79–96.  
726 [https://doi.org/10.1016/S0012-1606\(03\)00247-1](https://doi.org/10.1016/S0012-1606(03)00247-1) PMID: 12885557
- 727 99. McKeown SJ, Lee VM, Bronner-Fraser M, Newgreen DF, Farlie PG. Sox10 overexpression  
728 induces neural crest-like cells from all dorsoventral levels of the neural tube but  
729 inhibits differentiation. *Dev Dyn*. 2005; 233: 430–444. <https://doi.org/10.1002/dvdy.20341>  
730 PMID: 15768395
- 731 100. Prasad MK, Reed X, Gorkin DU, Cronin JC, McAdow AR, Chain K et al. SOX10 directly  
732 modulates ERBB3 transcription via an intronic neural crest enhancer. *BMC Dev Biol*.  
733 2011; 11. <https://doi.org/10.1186/1471-213X-11-40> PMID: 21672228
- 734 101. Baggiolini A, Varum S, Mateos JM, Bettosini D, John N, Bonalli M et al.  
735 Premigratory and  
736 migratory neural crest cells are multipotent in vivo. *Cell Stem Cell*. 2015; 16: 314–322.  
737 <https://doi.org/10.1016/j.stem.2015.02.017> PMID: 25748934

- 738 102. McKinney MC, McLennan R, Kulesa PM. Angiopoietin 2 signaling plays a critical role in  
739 neural crest cell migration. BMC Biol. 2016; 14. [https://doi.org/10.1186/s12915-016-0323-](https://doi.org/10.1186/s12915-016-0323-9)  
740 [9](https://doi.org/10.1186/s12915-016-0323-9) PMID: 27978830
- 741 103. Lee HO, Levorse JM, Shin MK. The endothelin receptor-B is required for the migration of  
742 neural crest-derived melanocyte and enteric neuron precursors. Dev Biol. 2003; 259: 162  
743 175. [https://doi.org/10.1016/S0012-1606\(03\)00160-X](https://doi.org/10.1016/S0012-1606(03)00160-X) PMID: 12812796
- 744 104. Giovannone D, Ortega B, Reyes M, El-Ghali N, Rabadi M, Sao S et al. Chicken trunk  
745 neural crest migration visualized with HNK1. Acta Histochem. 2015; 117: 255–266.  
746 <https://doi.org/10.1016/j.acthis.2015.03.002> PMID: 25805416
- 747 105. Zuhdi N, Ortega B, Giovannone D, Ra H, Reyes M, Asención V et al. Slits Affect the  
748 Timely Migration of Neural Crest Cells Via Robo Receptor. Dev Dyn. 2012; 241: 1274  
749 1288. <https://dx.doi.org/10.1002%2Fdvdy.23817> PMID: 22689303
- 750 106. Chiovaro F, Chiquet-Ehrismann R, Chiquet M. Transcriptional regulation of tenascin  
751 genes. Cell Adh Migr. 2015; 9: 34–47.  
752 <https://dx.doi.org/10.1080%2F19336918.2015.1008333> PMID: 25793574
- 753 107. Taneyhill AL, Coles EG, Bronner-Fraser M. Snail2 directly represses cadherin6B during  
754 epithelial-to-mesenchymal transitions of the neural crest. Development. 2007; 134: 1480–  
755 1490. <https://dx.doi.org/10.1242%2Fdev.02834> PMID: 17344227



- 756 108. Groysman M, Shoval I, Kalcheim C. A negative modulatory role for rho and rho-  
757 associated  
758 kinase signaling in delamination of neural crest cells. *Neural Develop.* 2008; 3: 27.  
759 <https://dx.doi.org/10.1186%2F1749-8104-3-27> PMID: 18945340
- 760 109. Vega FM, Thomas M, Reymond N, Ridley AJ. The Rho GTPase RhoB regulates cadherin  
761 expression and epithelial cell-cell interaction. *Cell Commun Signal.* 2015; 13: 6.  
762 <https://doi.org/10.1186/s12964-015-0085-y> PMID: 25630770
- 763 110. Liu Q, Dalman MR, Sarmah S, Chen S, Chen Y, Hurlbut AK et al. Cell adhesion molecule  
764 cadherin-6 function in zebrafish cranial and lateral line ganglia development. *Dev Dyn.*  
765 2011; 240: 1716–26. <https://doi.org/10.1002/dvdy.22665> PMID: 21584906
- 766 111. Chiovaro F, Chiquet-Ehrismann R, Chiquet M. Transcriptional regulation of tenascin  
767 genes. *Cell Adh Migr.* 2015; 9: 34–47.  
768 <https://dx.doi.org/10.1080%2F19336918.2015.1008333> PMID: 25793574
- 769 112. Tomczuk M, Takahashi Y, Huang J, Murase S, Mistretta M, Klaffky E et al. Role of  
770 multiple beta1 integrins in cell adhesion to the disintegrin domains of ADAMs 2 and 3.  
771 *Exp Cell Res.* 2003; 290: 68–81. [https://doi.org/10.1016/S0014-4827\(03\)00307-0](https://doi.org/10.1016/S0014-4827(03)00307-0) PMID:  
772 14516789
- 773 113. Dennis AR, McLennan R, Jessica MT, Craig LS, Jeffrey SH, Kulesa PM. The neural

- 774 crest cell cycle is related to phases of migration in the head. *Development*. 2014; 141:  
775 1095–1103. [https://dx.doi.org/10.1242%2Fdev.098855](https://dx.doi.org/10.1242/dev.098855) PMID: 24550117

Fig.4.

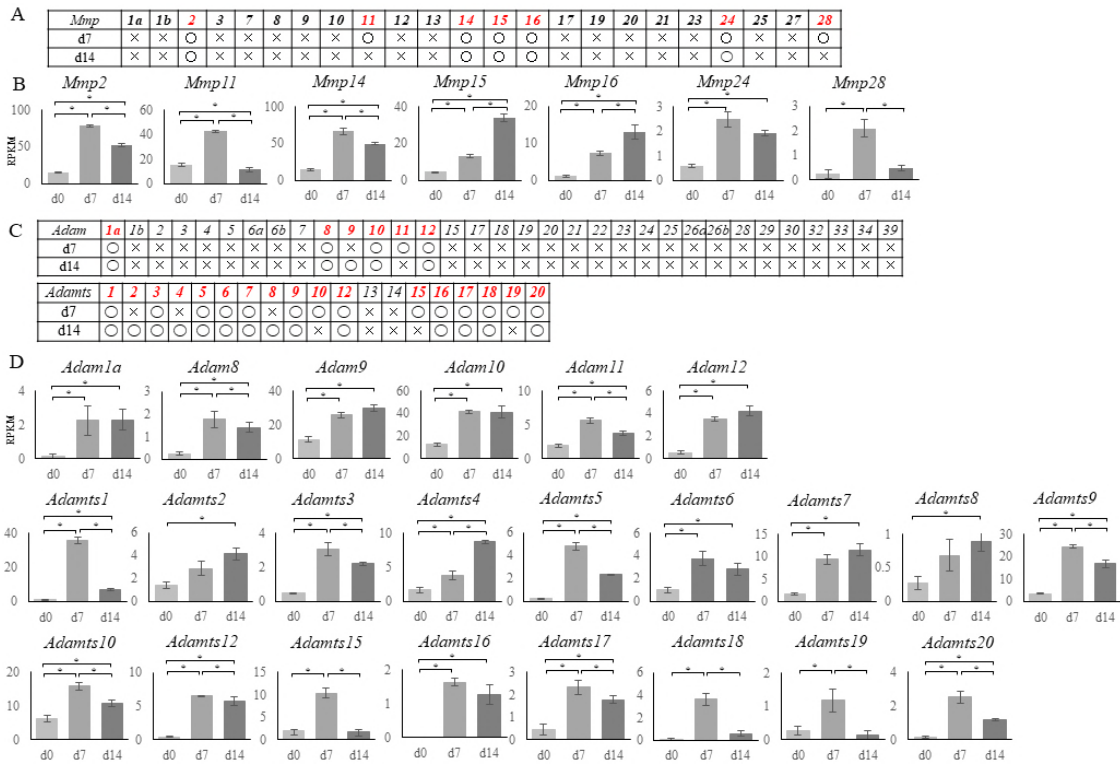

Fig.2 .

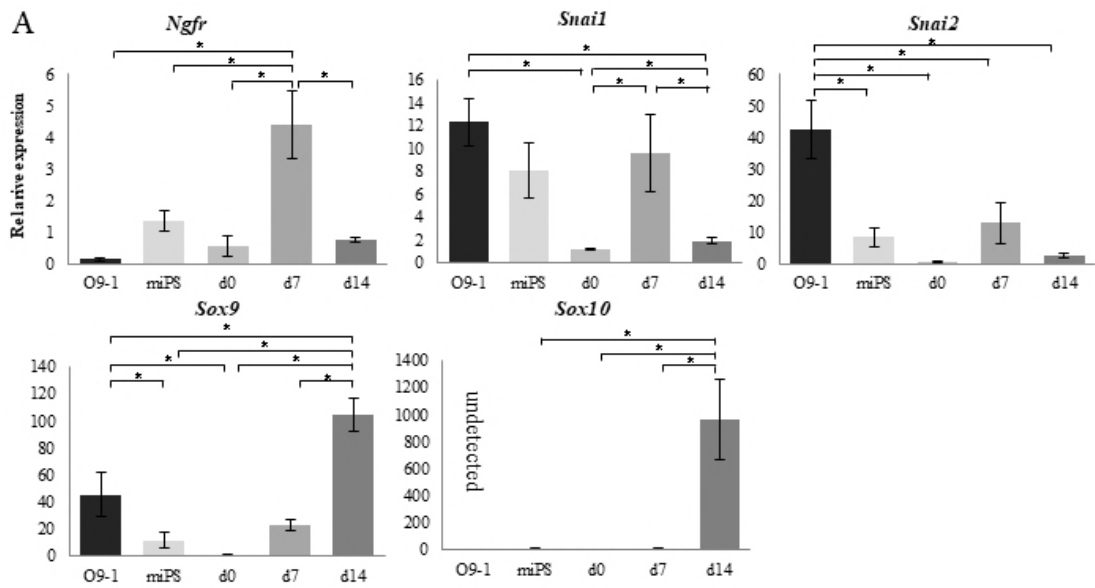

**B**

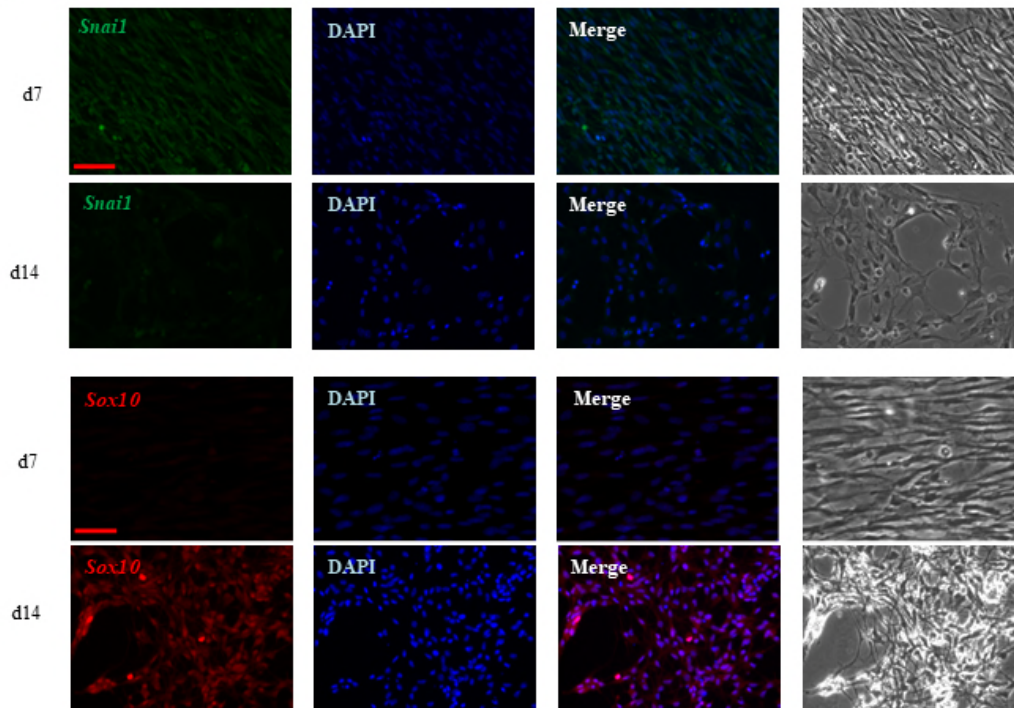

Fig. 3.

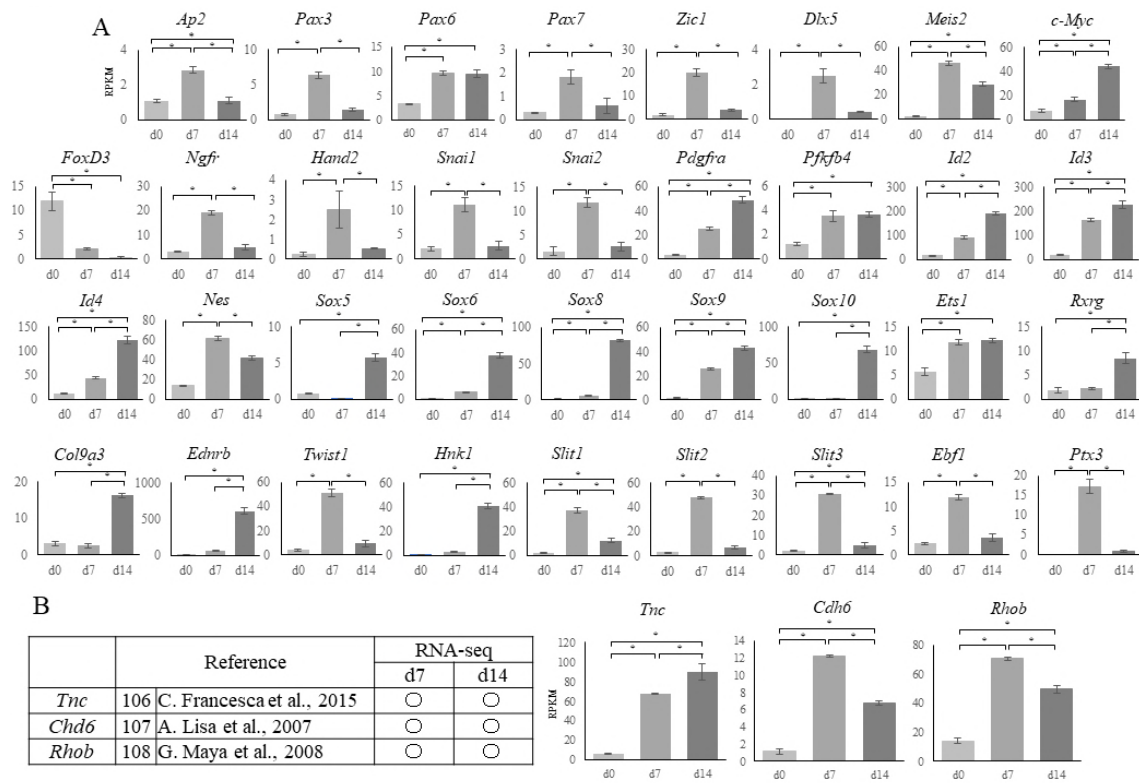

Fig 1

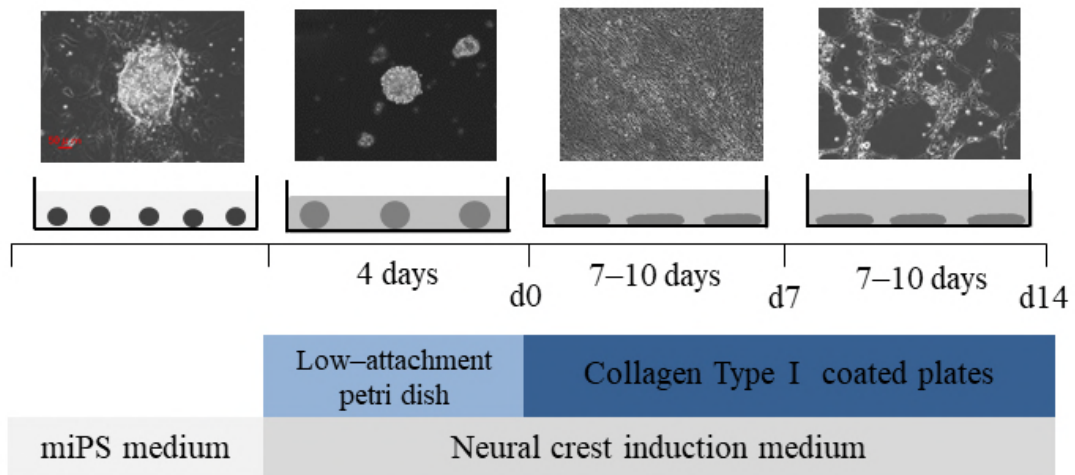

Source: https://www.biorxiv.org/content/10.1101/432302v1.full.pdf
